# Supplementary material
Source: bioRxiv or medRxiv preprint supplement (https://www.biorxiv.org/highwire/filestream/115957/field_highwire_adjunct_files/0/371450-1.pdf)
Supplement: Supplementary file [file 371450-1.pdf]

# Genetic discovery and translational decision support from exome sequencing of 20,791 type 2 diabetes cases and 24,440 controls from five ancestries

## Supplementary Information

### Supplementary Tables

**Supplementary Table 1: Samples included in analysis.** Shown are characteristics of the cohorts from which we selected samples for exome sequencing. Subgroup: the label used for the collection of samples throughout the manuscript and figures. Ancestry: the ancestry of the samples. Consortium: the consortium in which samples were first collected and/or analyzed. Study: the study (i.e. cohort) from which samples were drawn. Citation(s): references describing the samples in more detail. T2D Case (Control) Ascertainment: criteria used to define and/or select T2D cases (controls). T1D and MODY exclusion criteria: criteria used (if applicable) to exclude type 1 diabetes or MODY cases from the study. Whole exome sequencing technology: the sequence capture technology used for exome sequencing of the samples. dbGAP (EGA): accession number for download of subgroup data from dbGAP (EGA).

[See separate Excel file]

**Supplementary Table 2: Samples excluded from analysis based on quality control metrics.** To identify samples with evidence of poor sequencing quality, we computed a range of metrics. We then excluded samples who appeared as visual outliers on plots (stratified by sample ancestry and sequencing technology) of these metrics; example plots are shown in **Supplementary Figure 2**. Shown are the number of samples excluded according to each metric, as well as the total number of samples excluded across all metrics.

| <b>Metric</b>                                | <b>Samples Removed</b> |
|----------------------------------------------|------------------------|
| Average (allele balance - 50%)               | 6                      |
| Average allele balance                       | 14                     |
| Call rate                                    | 260                    |
| GWAS concordance (GoT2D samples)             | 202                    |
| GWAS concordance (SIGMA samples)             | 17                     |
| GWAS concordance (T2D-GENES samples)         | 10                     |
| GWAS concordance (newly sequenced samples)   | 26                     |
| Heterozygosity                               | 27                     |
| Heterozygosity at common variants            | 8                      |
| Heterozygosity at low frequency variants     | 41                     |
| Number of heterozygous genotypes             | 15                     |
| Number of homozygous non-reference genotypes | 12                     |
| Number of minor alleles                      | 227                    |
| Number of non-reference SNP alleles          | 2                      |
| Number of singleton variants                 | 45                     |
| Number of variants                           | 241                    |
| Transition:Transversion                      | 30                     |
| <b>Total</b>                                 | <b>481</b>             |

**Supplementary Table 3: Variants identified from exome sequencing.** Shown are the number of variants identified by exome sequencing and then advanced for association analysis after quality control. Variant counts are stratified by sequence ontology [1] annotation, produced by the Variant Effect Predictor [2], and further by minor allele frequency (MAF), calculated as the maximum across all ancestries. Rows in the table are shown in decreasing order of predicted deleteriousness.

| <b>Annotation</b>                  | <b>MAF&gt;0.05</b> | <b>0.005&lt;MAF&lt;0.05</b> | <b>MAF&lt;0.005</b> | <b>Total</b>   |
|------------------------------------|--------------------|-----------------------------|---------------------|----------------|
| splice_acceptor_variant            | 82                 | 252                         | 13431               | 13765          |
| splice_donor_variant               | 113                | 297                         | 16898               | 17308          |
| stop_gained                        | 429                | 1061                        | 57132               | 58624          |
| frameshift_variant                 | 756                | 1501                        | 41963               | 44221          |
| stop_lost                          | 29                 | 48                          | 1763                | 1840           |
| start_lost                         | 34                 | 89                          | 3809                | 3932           |
| inframe_insertion                  | 218                | 260                         | 3326                | 3804           |
| inframe_deletion                   | 492                | 1175                        | 14830               | 16497          |
| missense_variant                   | 25660              | 60344                       | 2011159             | 2097179        |
| protein_altering_variant           | 10                 | 11                          | 145                 | 166            |
| splice_region_variant              | 5894               | 10074                       | 221362              | 237335         |
| incomplete_terminal_codon_variant  | 2                  | 1                           | 27                  | 30             |
| stop_retained_variant              | 18                 | 42                          | 988                 | 1048           |
| synonymous_variant                 | 27748              | 46978                       | 994052              | 1068784        |
| coding_sequence_variant            | 21                 | 21                          | 188                 | 230            |
| mature_miRNA_variant               | 4                  | 11                          | 421                 | 436            |
| 5_prime_UTR_variant                | 2779               | 5020                        | 88785               | 96586          |
| 3_prime_UTR_variant                | 4748               | 8278                        | 148107              | 161135         |
| non_coding_transcript_exon_variant | 3438               | 5461                        | 95771               | 104671         |
| intron_variant                     | 62536              | 101810                      | 1798630             | 1963024        |
| upstream_gene_variant              | 4790               | 8956                        | 175482              | 189234         |
| downstream_gene_variant            | 5730               | 10705                       | 220197              | 236636         |
| TF_binding_site_variant            | 2                  | 2                           | 5                   | 9              |
| regulatory_region_variant          | 31                 | 58                          | 487                 | 576            |
| intergenic_variant                 | 137                | 138                         | 1700                | 1975           |
| Other                              | 894                | 589                         | 5270                | 6753           |
| <b>Total</b>                       | <b>146595</b>      | <b>263182</b>               | <b>5915928</b>      | <b>6325798</b> |

**Supplementary Table 4: Most significant single-variant associations from exome sequence analysis.** Shown are the most significant results from exome sequence single-variant association analysis. Gene: the closest gene to the variant. Variant: a unique identifier for the variant within our exome sequence analysis. Consequence: the predicted consequence of the variant, defined by sequence ontology annotation and produced by the Variant Effect Predictor. Impact: the impact of the variant, as predicted by the Variant Effect Predictor (High: High; Med: Medium; Low: Low; Mod: Modifier). Change: the predicted protein change, defined according to the “best guess” transcript as described in **Methods**. MAF: the minor allele frequency of the variant, calculated as the maximum across all ancestries. Case: the number of samples with T2D carrying the variant. Ctrl: the number of samples without T2D carrying the variant. OR: the odds-ratio, calculated from the Firth analysis. P: the *p*-value, calculated from the EMMAX analysis.

| Gene            | Variant        | Consequence             | Impact | Change       | MAF    | Case  | Ctrl  | OR    | P       |
|-----------------|----------------|-------------------------|--------|--------------|--------|-------|-------|-------|---------|
| <i>PAX4</i>     | rs2233580      | missense_variant        | Med.   | p.Arg192His  | 0.12   | 890   | 563   | 1.7   | 7.6e-22 |
| <i>SLC30A8</i>  | rs13266634     | missense_variant        | Med.   | p.Arg325Trp  | 0.43   | 12258 | 13756 | 0.897 | 3.4e-11 |
| <i>WFS1</i>     | rs1801212      | missense_variant        | Med.   | p.Val333Ile  | 0.27   | 7101  | 8456  | 1.13  | 1.2e-10 |
| <i>KCNJ11</i>   | rs5219         | missense_variant        | Med.   | p.Lys23Glu   | 0.39   | 16471 | 15959 | 0.898 | 1.2e-10 |
| <i>KCNJ11</i>   | rs5215         | missense_variant        | Med.   | p.Val250Ile  | 0.39   | 16687 | 16132 | 0.901 | 3.4e-10 |
| <i>SLC16A11</i> | rs2292351      | 5_prime_UTR_variant     | Low    | -            | 0.34   | 5244  | 4249  | 1.25  | 1.3e-09 |
| <i>SLC16A11</i> | rs13342692     | missense_variant        | Med.   | p.Asp127Gly  | 0.34   | 9468  | 7492  | 1.12  | 1.7e-09 |
| <i>SLC16A11</i> | rs75493593     | missense_variant        | Med.   | p.Pro443Thr  | 0.3    | 6262  | 4929  | 1.24  | 3.2e-09 |
| <i>WFS1</i>     | rs1801213      | synonymous_variant      | Low    | p.Arg228Arg  | 0.33   | 10641 | 11689 | 1.1   | 3.7e-09 |
| <i>SLC16A13</i> | rs76070643     | synonymous_variant      | Low    | p.Tyr166Tyr  | 0.3    | 6357  | 5028  | 1.2   | 1.8e-08 |
| <i>WFS1</i>     | rs1046317      | 3_prime_UTR_variant     | Mod.   | -            | 0.32   | 9957  | 11005 | 1.09  | 2.0e-08 |
| <i>SFI1</i>     | rs145181683    | missense_variant        | Med.   | p.Arg724Trp  | 0.16   | 2861  | 2144  | 1.19  | 3.2e-08 |
| <i>WFS1</i>     | rs9998519      | intron_variant          | Mod.   | -            | 0.39   | 13395 | 14741 | 1.08  | 4.3e-08 |
| <i>WFS1</i>     | rs10010131     | intron_variant          | Mod.   | -            | 0.39   | 13046 | 14406 | 1.08  | 5.6e-08 |
| <i>ABCC8</i>    | rs757110       | missense_variant        | Med.   | p.Ala1369Ser | 0.39   | 16626 | 16237 | 0.913 | 7.1e-08 |
| <i>WFS1</i>     | rs1801214      | synonymous_variant      | Low    | p.Asn500Asn  | 0.38   | 12841 | 14187 | 1.08  | 1.6e-07 |
| <i>MC4R</i>     | rs79783591     | missense_variant        | Med.   | p.Ile269Asn  | 0.0089 | 195   | 83    | 2.17  | 3.4e-07 |
| <i>WFS1</i>     | rs1801206      | synonymous_variant      | Low    | p.Val395Val  | 0.53   | 15408 | 16499 | 1.08  | 3.7e-07 |
| <i>WFS1</i>     | rs1046316      | synonymous_variant      | Low    | p.Ser855Ser  | 0.32   | 10412 | 11572 | 1.08  | 5.3e-07 |
| <i>COBLL1</i>   | rs7607980      | missense_variant        | Med.   | p.Asn939Asp  | 0.15   | 4010  | 4651  | 0.857 | 6.3e-07 |
| <i>PISD</i>     | rs12171042     | downstream_gene_variant | Mod.   | -            | 0.53   | 15797 | 15264 | 1.09  | 7.0e-07 |
| <i>PAM</i>      | rs35658696     | missense_variant        | Med.   | p.Asp563Gly  | 0.05   | 1038  | 944   | 1.29  | 1.3e-06 |
| <i>PPIP5K2</i>  | rs36046591     | missense_variant        | Med.   | p.Ser1207Gly | 0.049  | 986   | 905   | 1.3   | 1.4e-06 |
| <i>RAI1</i>     | rs3818717      | synonymous_variant      | Low    | p.Ile1867Ile | 0.55   | 14691 | 16514 | 0.927 | 1.8e-06 |
| <i>PPIP5K2</i>  | rs116234738    | 3_prime_UTR_variant     | Mod.   | -            | 0.055  | 956   | 894   | 1.29  | 2.3e-06 |
| <i>MAEA</i>     | rs2272481      | intron_variant          | Mod.   | -            | 0.42   | 10249 | 10165 | 0.898 | 2.7e-06 |
| <i>COBLL1</i>   | rs34305002     | intron_variant          | Mod.   | -            | 0.25   | 3646  | 4625  | 0.863 | 3.3e-06 |
| <i>PIK3C2B</i>  | rs1553921      | synonymous_variant      | Low    | p.Leu96Leu   | 0.64   | 10215 | 8702  | 0.912 | 3.5e-06 |
| <i>WDR13</i>    | var_X_48460357 | splice_acceptor_variant | Low    | -            | 0.0006 | 21    | 2     | 3.48  | 3.6e-06 |
| <i>TMCC2</i>    | rs1768586      | synonymous_variant      | Low    | p.Ala315Ala  | 0.36   | 9113  | 10374 | 0.924 | 4.0e-06 |
| <i>MDM4</i>     | rs4252717      | intron_variant          | Mod.   | -            | 0.42   | 19786 | 19287 | 0.934 | 4.4e-06 |
| <i>MDM4</i>     | rs2290854      | intron_variant          | Mod.   | -            | 0.72   | 20466 | 19245 | 0.935 | 4.5e-06 |
| <i>GCKR</i>     | rs1260326      | missense_variant        | Med.   | p.Leu446Pro  | 0.5    | 15010 | 16627 | 1.07  | 5.4e-06 |
| <i>CDC123</i>   | rs12590        | 3_prime_UTR_variant     | Mod.   | -            | 0.24   | 9078  | 8543  | 1.11  | 5.6e-06 |
| <i>TMCC2</i>    | rs1668870      | intron_variant          | Mod.   | -            | 0.36   | 8368  | 9585  | 0.919 | 5.7e-06 |
| <i>ANKRD36C</i> | rs188178234    | missense_variant        | Med.   | p.Arg786Trp  | 0.012  | 265   | 364   | 0.713 | 6.2e-06 |
| <i>TMCC2</i>    | rs1668867      | synonymous_variant      | Low    | p.Tyr562Tyr  | 0.36   | 9505  | 10664 | 0.926 | 6.8e-06 |
| <i>PIK3C2B</i>  | rs1124777      | synonymous_variant      | Low    | p.Pro199Pro  | 0.64   | 10186 | 8702  | 0.915 | 6.9e-06 |
| <i>SIN3A</i>    | rs4886696      | intron_variant          | Mod.   | -            | 0.47   | 13368 | 15391 | 1.08  | 7.9e-06 |
| <i>ZRANB2</i>   | rs11556475     | synonymous_variant      | Low    | p.Tyr114Tyr  | 0.16   | 3365  | 3068  | 1.12  | 8.3e-06 |
| <i>CDC123</i>   | rs1051055      | 3_prime_UTR_variant     | Mod.   | -            | 0.38   | 14476 | 13738 | 0.902 | 9.2e-06 |
| <i>TGFB1</i>    | rs11466334     | intron_variant          | Mod.   | -            | 0.082  | 877   | 555   | 1.31  | 9.5e-06 |
| <i>WFS1</i>     | rs1046314      | synonymous_variant      | Low    | p.Lys811Lys  | 0.49   | 15003 | 16045 | 1.06  | 9.5e-06 |
| <i>SLC26A3</i>  | rs117703371    | splice_acceptor_variant | Low    | p.Ser438Ser  | 0.0084 | 236   | 169   | 1.46  | 1.0e-05 |
| <i>BICD1</i>    | rs183649090    | intron_variant          | Mod.   | -            | 0.0019 | 28    | 73    | 0.426 | 1.1e-05 |
| <i>RNGTT</i>    | rs6937994      | 3_prime_UTR_variant     | Mod.   | -            | 0.075  | 598   | 664   | 0.725 | 1.1e-05 |
| <i>SNX9</i>     | rs80009789     | intron_variant          | Mod.   | -            | 0.069  | 740   | 816   | 0.783 | 1.2e-05 |
| <i>PRR14L</i>   | rs131224       | upstream_gene_variant   | Mod.   | -            | 0.19   | 3986  | 2813  | 1.14  | 1.2e-05 |
| <i>SCN9A</i>    | rs12478318     | downstream_gene_variant | Mod.   | -            | 0.22   | 4367  | 3522  | 1.13  | 1.2e-05 |
| <i>PTGER3</i>   | rs5671         | synonymous_variant      | Low    | p.Thr206Thr  | 0.16   | 3386  | 3081  | 1.15  | 1.3e-05 |

**Supplementary Table 5: Most significant gene-level associations from exome sequence analysis.**

Shown are the most significant results from gene-level analysis. Genes are ranked according the minimum  $p$ -value achieved across the four gene-level analyses. Gene: a unique identifier for the gene within our exome sequence analysis. Var (CAF): the number of alleles (combined allele frequency of variants) in the mask achieving the strongest association across the four tests (i.e. the 0/5 1% mask for the weighted test, or the mask with the minimum  $p$ -value for the minimum  $p$ -value test). Burden: results from the burden analysis. SKAT: results from the SKAT analysis. Min P: results from the minimum  $p$ -value analysis. Weighted: results from the weighted analysis. OR: the odds-ratio as estimated from the burden analysis. P: the  $p$ -value from the analysis.

| Gene     | Best Result |          | Burden |          |         |          | SKAT     |            |
|----------|-------------|----------|--------|----------|---------|----------|----------|------------|
|          | Var         | CAF      | OR     | P        | OR      | P        | Min P    | Weighted P |
| MC4R     | 41          | 0.00795  | 2.07   | 2.74e-10 | 2.2     | 4.81e-09 | 7.74e-08 | 3.48e-08   |
| PAM      | 79          | 0.0493   | 1.31   | 1.58e-08 | 1.44    | 2.2e-09  | 1.53e-07 | 7.03e-08   |
| SLC30A8  | 86          | 0.0116   | 0.598  | 1.85e-07 | 0.397   | 1.29e-08 | 0.00011  | 0.000221   |
| IGFBPL1  | 33          | 0.00522  | 0.564  | 0.000108 | 0.208   | 4.5e-06  | 0.0222   | 0.00114    |
| BICD1    | 188         | 0.0163   | 0.857  | 0.214    | 0.85    | 0.575    | 1.49e-05 | 0.632      |
| UBE2NL   | 5           | 0.000417 | 12.7   | 2.71e-05 | 1.66    | 0.115    | 0.00963  | 0.29       |
| ING3     | 55          | 0.00255  | 2.29   | 0.000112 | 7.03    | 3.47e-05 | 0.0268   | 0.0135     |
| HNF1A    | 131         | 0.0184   | 1.23   | 0.0219   | 1.47    | 0.0125   | 3.62e-05 | 0.00106    |
| NUMA1    | 147         | 0.0459   | 1.14   | 0.0249   | 1.08    | 0.202    | 0.000129 | 4.27e-05   |
| MAP3K15  | 256         | 0.0392   | 0.85   | 7.76e-05 | 0.777   | 0.00239  | 0.0035   | 0.12       |
| PDX1     | 11          | 0.000371 | 4.71   | 0.0214   | 3.46    | 0.000166 | 0.165    | 0.0573     |
| DPH7     | 31          | 0.00631  | 1.27   | 0.186    | 1.3     | 0.0874   | 0.000818 | 0.000184   |
| MGAT4C   | 28          | 0.00134  | 3.13   | 0.000187 | 1.9     | 0.00303  | 0.00823  | 0.000886   |
| TMEM216  | 3           | 0.301    | 1.08   | 0.000294 | 1.08    | 0.000207 | 0.573    | 0.584      |
| HYAL2    | 74          | 0.00308  | 0.503  | 0.000728 | 0.292   | 0.000228 | 0.0554   | 0.024      |
| MBD3     | 9           | 0.000649 | 3.94   | 0.00415  | 4.9     | 0.000239 | 0.0137   | 0.00672    |
| SOCS2    | 37          | 0.00334  | 1.96   | 0.000271 | 5.16    | 0.000352 | 0.00539  | 0.00334    |
| SLC16A2  | 57          | 0.262    | 0.935  | 0.000285 | 0.945   | 0.000639 | 0.411    | 0.575      |
| PTPRC    | 274         | 0.033    | 1.23   | 0.000297 | 1.48    | 0.0162   | 0.0363   | 0.11       |
| ANGPTL6  | 38          | 0.00598  | 0.73   | 0.0585   | 0.744   | 0.0443   | 0.00102  | 0.0003     |
| STAT4    | 6           | 0.00102  | 0.677  | 0.00624  | 0.364   | 0.000305 | 0.00294  | 0.000527   |
| PCBP1    | 13          | 0.000371 | 0.0983 | 0.000568 | 0.00288 | 0.000333 | 0.243    | 0.165      |
| MAGEB5   | 25          | 0.00183  | 0.53   | 0.000454 | 0.138   | 0.000885 | 1.       | 1.         |
| ARHGEF7  | 107         | 0.0201   | 1.26   | 0.608    | 1.18    | 0.499    | 0.00165  | 0.000458   |
| SLC48A1  | 12          | 0.000951 | 3.22   | 0.000964 | 22.6    | 0.000519 | 0.936    | 0.777      |
| DGKK     | 147         | 0.0121   | 0.862  | 0.0519   | 1.01    | 0.975    | 0.00052  | 0.179      |
| TDRD5    | 20          | 0.00805  | 0.674  | 0.00203  | 0.617   | 0.000521 | 0.00331  | 0.00114    |
| TCEA1    | 12          | 0.000441 | 0.0944 | 0.00053  | 0.531   | 0.0331   | 0.0612   | 0.354      |
| RXRG     | 22          | 0.000788 | 3.39   | 0.00291  | 3.6     | 0.000546 | 0.195    | 0.126      |
| KDM7A    | 110         | 0.0136   | 1.37   | 0.000559 | 2.03    | 0.0017   | 0.394    | 0.22       |
| C19orf66 | 49          | 0.00413  | 1.7    | 0.00165  | 3.86    | 0.000566 | 0.131    | 0.0712     |
| PDF      | 27          | 0.0029   | 0.578  | 0.00399  | 0.776   | 0.641    | 0.000584 | 0.75       |
| OR2M4    | 10          | 0.00415  | 0.554  | 0.000607 | 0.699   | 0.00607  | 0.0411   | 0.0263     |
| RHBDD2   | 8           | 0.000557 | 0.721  | 0.0642   | 0.458   | 0.0181   | 0.00559  | 0.000626   |
| HLC5     | 66          | 0.00364  | 1.91   | 0.000644 | 1.42    | 0.0278   | 0.161    | 0.167      |
| NT5DC1   | 92          | 0.0123   | 1.21   | 0.0905   | 1.46    | 0.0633   | 0.00276  | 0.000653   |
| TMEM161B | 84          | 0.00487  | 1.56   | 0.00856  | 2.97    | 0.000664 | 0.166    | 0.0599     |
| LRRTM3   | 80          | 0.0083   | 1.44   | 0.00078  | 2.54    | 0.000884 | 0.000678 | 0.000673   |
| PRSS54   | 8           | 0.000719 | 0.569  | 0.295    | 0.923   | 0.646    | 0.000717 | 0.0802     |
| MEST     | 29          | 0.00148  | 2.48   | 0.00341  | 5.64    | 0.000743 | 0.216    | 0.0942     |
| MIEF1    | 102         | 0.0501   | 1.17   | 0.000751 | 1.28    | 0.000891 | 0.00996  | 0.0305     |
| RUVBL2   | 84          | 0.00582  | 1.58   | 0.00122  | 2.49    | 0.000803 | 0.246    | 0.0842     |
| FLCN     | 124         | 0.0111   | 0.702  | 0.00245  | 0.485   | 0.000816 | 0.706    | 0.945      |
| DHX9     | 11          | 0.000441 | 0.0993 | 0.000829 | 0.569   | 0.153    | 0.037    | 0.00564    |
| TRDN     | 131         | 0.0227   | 1.28   | 0.000854 | 1.17    | 0.598    | 0.00107  | 0.0517     |
| ABCB11   | 226         | 0.0231   | 1.21   | 0.0161   | 1.55    | 0.000881 | 0.261    | 0.0236     |
| MAGEE2   | 119         | 0.278    | 1.07   | 0.000907 | 1.06    | 0.00241  | 0.473    | 0.229      |
| ANKS3    | 186         | 0.0255   | 0.808  | 0.00287  | 0.664   | 0.000908 | 0.614    | 0.232      |
| DHRS13   | 73          | 0.00853  | 1.66   | 0.0899   | 1.3     | 0.101    | 0.000917 | 0.0054     |
| PPP3CA   | 41          | 0.00445  | 0.745  | 0.0489   | 0.517   | 0.0712   | 0.000921 | 0.000992   |

**Supplementary Table 6: Associations by allele mask for most significant gene-level associations.**

For the 11 strongest gene-level associations, as determined by the weighted burden, weighted SKAT, minimum  $p$ -value burden, and minimum  $p$ -value SKAT analyses, shown are statistics for each mask and each of the burden test and SKAT. We performed analyses without the use of allele weights and including all alleles in each mask (so that the sets of alleles are nested within masks). Gene: a unique identifier for the gene within our exome sequence analysis. Trans: the transcript set used for the analysis (All: all transcripts. Best: "best-guess" transcript). Mask: the allele mask used for analysis. Var: the number of alleles included in the mask. CAF: the combined allele frequency of all alleles in the mask. OR: the aggregate odds-ratio for alleles in the mask, computed from the burden test. Burden: the  $p$ -value from burden analysis of alleles in the mask. SKAT: the  $p$ -value from SKAT analysis of alleles in the mask.

| Gene           | Trans | Mask            | Var | CAF      | OR     | Burden   | SKAT     |
|----------------|-------|-----------------|-----|----------|--------|----------|----------|
| <i>MC4R</i>    | All   | LofTee          | 4   | 0.000325 | 1.72   | 0.317    | 0.772    |
|                |       | 16/16           | 4   | 0.000325 | 1.72   | 0.317    | 0.772    |
|                |       | 11/11           | 5   | 0.000371 | 1.78   | 0.263    | 0.823    |
|                |       | 5/5             | 40  | 0.00791  | 2.05   | 1.57e-10 | 5.38e-08 |
|                |       | 5/5 + LofTee LC | 41  | 0.00795  | 2.07   | 8.46e-11 | 4.88e-08 |
|                |       | 1/5 1%          | 94  | 0.0156   | 1.45   | 2.73e-06 | 2.39e-08 |
|                |       | 0/5 1%          | 105 | 0.0173   | 1.41   | 4.17e-06 | 6.21e-08 |
| <i>PAM</i>     | All   | LofTee          | 6   | 0.000255 | 1.21   | 0.754    | 0.684    |
|                |       | 16/16           | 6   | 0.000255 | 1.21   | 0.754    | 0.684    |
|                |       | 11/11           | 14  | 0.00058  | 1.41   | 0.394    | 0.304    |
|                |       | 5/5             | 79  | 0.0493   | 1.31   | 4.28e-09 | 1.e-07   |
|                |       | 5/5 + LofTee LC | 79  | 0.0493   | 1.31   | 4.28e-09 | 1.e-07   |
|                |       | 1/5 1%          | 196 | 0.0603   | 1.27   | 1.01e-08 | 4.13e-08 |
|                |       | 0/5 1%          | 213 | 0.0626   | 1.26   | 7.64e-09 | 1.34e-07 |
| <i>SLC30A8</i> | Best  | LofTee          | 13  | 0.00118  | 0.457  | 0.0072   | 0.0323   |
|                |       | 16/16           | 13  | 0.00118  | 0.457  | 0.0072   | 0.0323   |
|                |       | 11/11           | 15  | 0.00132  | 0.504  | 0.0127   | 0.041    |
|                |       | 5/5             | 37  | 0.00448  | 0.473  | 1.43e-06 | 0.000724 |
|                |       | 5/5 + LofTee LC | 37  | 0.00448  | 0.473  | 1.43e-06 | 0.000724 |
|                |       | 1/5 1%          | 86  | 0.0116   | 0.598  | 4.7e-08  | 3.57e-05 |
|                |       | 0/5 1%          | 103 | 0.0135   | 0.622  | 5.46e-08 | 2.8e-05  |
| <i>IGFBPL1</i> | All   | LofTee          | 2   | 0.000209 | 0.0577 | 0.00267  | 0.00744  |
|                |       | 16/16           | 2   | 0.000209 | 0.0577 | 0.00267  | 0.00744  |
|                |       | 11/11           | 2   | 0.000209 | 0.0577 | 0.00267  | 0.00744  |
|                |       | 5/5             | 2   | 0.000209 | 0.0577 | 0.00267  | 0.00744  |
|                |       | 5/5 + LofTee LC | 4   | 0.000441 | 0.319  | 0.0214   | 0.0225   |
|                |       | 1/5 1%          | 33  | 0.00522  | 0.564  | 3.59e-05 | 0.00745  |
|                |       | 0/5 1%          | 45  | 0.0101   | 0.713  | 0.000692 | 0.108    |
| <i>BICD1</i>   | All   | LofTee          | 2   | 4.64e-05 | 0.137  | 0.142    | 0.245    |
|                |       | 16/16           | 2   | 4.64e-05 | 0.137  | 0.142    | 0.245    |
|                |       | 11/11           | 2   | 4.64e-05 | 0.137  | 0.142    | 0.245    |
|                |       | 5/5             | 34  | 0.00262  | 0.865  | 0.457    | 0.585    |
|                |       | 5/5 + LofTee LC | 36  | 0.00271  | 0.893  | 0.552    | 0.585    |
|                |       | 1/5 1%          | 180 | 0.0135   | 0.979  | 0.8      | 0.393    |
|                |       | 0/5 1%          | 198 | 0.0166   | 0.863  | 0.0529   | 2.83e-06 |
| <i>UBE2NL</i>  | Best  | 5/5 + LofTee LC | 5   | 0.000417 | 12.7   | 1.03e-05 | 0.00368  |
|                |       | 1/5 1%          | 19  | 0.00385  | 1.27   | 0.0466   | 0.185    |
|                |       | 0/5 1%          | 31  | 0.00466  | 1.23   | 0.0225   | 0.157    |
| <i>ING3</i>    | All   | 11/11           | 2   | 9.28e-05 | 7.49   | 0.0855   | 0.144    |
|                |       | 5/5             | 7   | 0.000209 | 3.11   | 0.115    | 0.213    |
|                |       | 5/5 + LofTee LC | 8   | 0.000487 | 2.37   | 0.058    | 0.224    |
|                |       | 1/5 1%          | 55  | 0.00255  | 2.29   | 3.1e-05  | 0.0106   |
|                |       | 0/5 1%          | 61  | 0.00385  | 1.84   | 0.000132 | 0.0582   |
|                |       | LofTee          | 3   | 6.96e-05 | 2.77   | 0.364    | 0.552    |
|                |       | 16/16           | 3   | 6.96e-05 | 2.77   | 0.364    | 0.552    |
|                |       | 11/11           | 24  | 0.00262  | 1.57   | 0.0204   | 0.049    |
|                |       | 5/5             | 32  | 0.00304  | 1.34   | 0.101    | 0.0458   |
|                |       | 5/5 + LofTee LC | 33  | 0.00306  | 1.32   | 0.118    | 0.0458   |
|                |       | 1/5 1%          | 119 | 0.0166   | 1.23   | 0.00504  | 8.38e-06 |

HNF1A Best

|         |      |                 |     |          |       |          |          |
|---------|------|-----------------|-----|----------|-------|----------|----------|
|         |      | 0/5 1%          | 131 | 0.0184   | 1.14  | 0.0526   | 8.26e-06 |
| NUMA1   | All  | LofTee          | 9   | 0.000209 | 0.813 | 0.766    | 0.531    |
|         |      | 16/16           | 9   | 0.000209 | 0.813 | 0.766    | 0.531    |
|         |      | 11/11           | 9   | 0.000209 | 0.813 | 0.766    | 0.531    |
|         |      | 5/5             | 147 | 0.0459   | 1.13  | 0.00828  | 2.47e-05 |
|         |      | 5/5 + LofTee LC | 149 | 0.0465   | 1.13  | 0.00909  | 2.54e-05 |
|         |      | 1/5 1%          | 460 | 0.0893   | 1.02  | 0.5      | 4.72e-05 |
|         |      | 0/5 1%          | 563 | 0.107    | 1.03  | 0.333    | 2.99e-05 |
| MAP3K15 | All  | LofTee          | 26  | 0.0039   | 0.732 | 0.011    | 0.157    |
|         |      | 16/16           | 26  | 0.0039   | 0.732 | 0.011    | 0.157    |
|         |      | 11/11           | 28  | 0.00399  | 0.732 | 0.0104   | 0.152    |
|         |      | 5/5             | 72  | 0.00916  | 0.834 | 0.0198   | 0.128    |
|         |      | 5/5 + LofTee LC | 80  | 0.00974  | 0.83  | 0.0137   | 0.14     |
|         |      | 1/5 1%          | 219 | 0.031    | 0.85  | 9.95e-05 | 0.00468  |
|         |      | 0/5 1%          | 256 | 0.0392   | 0.85  | 1.38e-05 | 0.00622  |
| PDX1    | Best | LofTee          | 2   | 4.64e-05 | 5.23  | 0.214    | 1.       |
|         |      | 16/16           | 2   | 4.64e-05 | 5.23  | 0.214    | 1.       |
|         |      | 11/11           | 11  | 0.000371 | 4.71  | 0.00546  | 0.274    |
|         |      | 5/5             | 15  | 0.00294  | 1.    | 0.989    | 0.274    |
|         |      | 5/5 + LofTee LC | 15  | 0.00294  | 1.    | 0.989    | 0.274    |
|         |      | 1/5 1%          | 57  | 0.00779  | 1.25  | 0.043    | 0.0448   |
|         |      | 0/5 1%          | 65  | 0.00893  | 1.17  | 0.131    | 0.045    |

**Supplementary Table 7: Evaluation of association signals in CHARGE.** Shown are results from gene-level analysis within the CHARGE dataset, in which the 50 genes with lowest  $p$ -value were advanced for analysis. Results are shown for each mask. Var: the number of alleles in the mask; CAC: the combined count of all alleles in the mask; Score: the score statistic from a burden analysis of the mask (positive values denote increased risk, negative values denote decreased risk); Burden: the  $p$ -value from a burden analysis of the mask; SKAT: the  $p$ -value from a SKAT analysis of the mask. Best Burden (SKAT) indicate  $p$ -values from an minimum  $p$ -value test across all masks for the Burden (SKAT) analyses.

| Gene        | Mask            | Var | CAC | Score | Burden | SKAT   |
|-------------|-----------------|-----|-----|-------|--------|--------|
| LRRTM3      | 5/5             | 4   | 5   | 7.1   | 0.0076 | 0.12   |
|             | 5/5 + LofTee LC | 4   | 5   | 7.1   | 0.0076 | 0.12   |
|             | 1/5 1%          | 32  | 139 | 5.1   | 0.024  | 0.48   |
|             | 0/5 1%          | 32  | 139 | 5.1   | 0.024  | 0.48   |
|             | Best Burden     |     |     |       | 0.015  |        |
|             | Best SKAT       |     |     |       |        | 0.23   |
| DHX9        | 11/11           | 1   | 1   | 3.1   | 0.076  | 0.076  |
|             | 5/5             | 5   | 6   | 0.51  | 0.47   | 0.18   |
|             | 5/5 + LofTee LC | 5   | 6   | 0.51  | 0.47   | 0.18   |
|             | 1/5 1%          | 26  | 36  | 1.3   | 0.26   | 0.43   |
|             | 0/5 1%          | 39  | 95  | 8.3   | 0.004  | 0.0087 |
|             | Best Burden     |     |     |       | 0.016  |        |
| MC4R        | Best SKAT       |     |     |       |        | 0.034  |
|             | LofTee          | 2   | 2   | -0.46 | 0.5    | 0.79   |
|             | 16/16           | 2   | 2   | -0.46 | 0.5    | 0.79   |
|             | 11/11           | 3   | 4   | 2.7   | 0.1    | 0.0054 |
|             | 5/5             | 12  | 18  | 4.8   | 0.029  | 0.018  |
|             | 5/5 + LofTee LC | 12  | 18  | 4.8   | 0.029  | 0.018  |
|             | 1/5 1%          | 33  | 306 | 0.27  | 0.61   | 0.66   |
|             | 0/5 1%          | 40  | 339 | 0.023 | 0.88   | 0.63   |
| Best Burden |                 |     |     | 0.14  |        |        |
| Best SKAT   |                 |     |     |       | 0.026  |        |
|             | LofTee          | 1   | 1   | 2.9   | 0.088  | 0.088  |
|             | 16/16           | 1   | 1   | 2.9   | 0.088  | 0.088  |
|             | 11/11           | 2   | 2   | 6.9   | 0.0086 | 0.032  |
|             | 5/5             | 11  | 15  | 4.8   | 0.029  | 0.13   |
|             | 5/5 + LofTee LC | 11  | 15  | 4.8   | 0.029  | 0.13   |
|             | 1/5 1%          | 35  | 107 | 1.9   | 0.19   | 0.29   |

MGAT4C

|                |                                    |    |     |        |              |              |
|----------------|------------------------------------|----|-----|--------|--------------|--------------|
|                | 0/5 1%<br>Best Burden<br>Best SKAT | 37 | 112 | 1.1    | 0.31<br>0.04 | 0.29<br>0.14 |
| <i>MAGEE2</i>  | LofTee                             | 5  | 6   | -0.89  | 0.35         | 0.34         |
|                | 16/16                              | 5  | 6   | -0.89  | 0.35         | 0.34         |
|                | 11/11                              | 5  | 6   | -0.89  | 0.35         | 0.34         |
|                | 5/5                                | 5  | 6   | -0.89  | 0.54         | 0.38         |
|                | 5/5 + LofTee LC                    | 6  | 7   | -0.1   | 0.75         | 0.23         |
|                | 1/5 1%                             | 32 | 122 | 2.2    | 0.14         | 0.19         |
|                | 0/5 1%                             | 57 | 230 | -0.3   | 0.58         | 0.01         |
|                | Best Burden<br>Best SKAT           |    |     |        | 0.45         | 0.041        |
| <i>UBE2NL</i>  | 5/5                                | 3  | 4   | 5.7    | 0.017        | 0.12         |
|                | 5/5 + LofTee LC                    | 3  | 4   | 5.7    | 0.017        | 0.12         |
|                | 1/5 1%                             | 13 | 44  | 1.1    | 0.29         | 0.56         |
|                | 0/5 1%                             | 22 | 62  | 0.8    | 0.37         | 0.77         |
|                | Best Burden<br>Best SKAT           |    |     |        | 0.046        | 0.3          |
| <i>PCBP1</i>   | 5/5                                | 2  | 4   | 5.8    | 0.032        | 0.075        |
|                | 5/5 + LofTee LC                    | 2  | 4   | 5.8    | 0.031        | 0.072        |
|                | 1/5 1%                             | 13 | 24  | 1.9    | 0.17         | 0.33         |
|                | 0/5 1%                             | 17 | 63  | 1.7    | 0.2          | 0.18         |
|                | Best Burden<br>Best SKAT           |    |     |        | 0.062        | 0.14         |
| <i>DGKK</i>    | LofTee                             | 2  | 2   | 5.2    | 0.023        | 0.072        |
|                | 16/16                              | 2  | 2   | 5.2    | 0.023        | 0.072        |
|                | 11/11                              | 2  | 2   | 5.2    | 0.023        | 0.072        |
|                | 5/5                                | 2  | 2   | 5.2    | 0.023        | 0.072        |
|                | 5/5 + LofTee LC                    | 2  | 2   | 5.2    | 0.023        | 0.072        |
|                | 1/5 1%                             | 36 | 119 | 0.11   | 0.74         | 0.9          |
|                | 0/5 1%                             | 71 | 304 | -0.013 | 0.91         | 0.96         |
|                | Best Burden<br>Best SKAT           |    |     |        | 0.066        | 0.2          |
| <i>PRSS54</i>  | LofTee                             | 1  | 1   | -0.54  | 0.7          | 0.68         |
|                | 16/16                              | 1  | 1   | -0.54  | 0.7          | 0.68         |
|                | 11/11                              | 1  | 1   | -0.54  | 0.7          | 0.68         |
|                | 5/5                                | 4  | 5   | -1.7   | 0.58         | 0.38         |
|                | 5/5 + LofTee LC                    | 4  | 5   | -1.7   | 0.35         | 0.24         |
|                | 1/5 1%                             | 33 | 275 | -3.    | 0.084        | 0.3          |
|                | 0/5 1%                             | 13 | 34  | -6.6   | 0.021        | 0.039        |
|                | Best Burden<br>Best SKAT           |    |     |        | 0.078        | 0.12         |
| <i>MAP3K15</i> | LofTee                             | 5  | 73  | -3.8   | 0.082        | 0.018        |
|                | 16/16                              | 5  | 73  | -3.8   | 0.082        | 0.018        |
|                | 11/11                              | 6  | 78  | -4.2   | 0.063        | 0.028        |
|                | 5/5                                | 28 | 182 | -3.6   | 0.1          | 0.14         |
|                | 5/5 + LofTee LC                    | 30 | 186 | -3.4   | 0.085        | 0.11         |
|                | 1/5 1%                             | 77 | 460 | -3.3   | 0.099        | 0.18         |
|                | 0/5 1%                             | 92 | 493 | -2.7   | 0.15         | 0.17         |
|                | Best Burden<br>Best SKAT           |    |     |        | 0.23         | 0.1          |
| <i>IGFBPL1</i> | LofTee                             | 1  | 2   | 0.49   | 0.48         | 0.48         |
|                | 16/16                              | 1  | 2   | 0.49   | 0.48         | 0.48         |
|                | 11/11                              | 1  | 2   | 0.49   | 0.48         | 0.48         |
|                | 5/5                                | 5  | 82  | 4.     | 0.089        | 0.13         |
|                | 5/5 + LofTee LC                    | 5  | 82  | 4.     | 0.045        | 0.068        |
|                | 1/5 1%                             | 18 | 236 | 1.5    | 0.22         | 0.046        |
|                | 0/5 1%                             | 27 | 382 | 0.26   | 0.61         | 0.066        |
|                | Best Burden<br>Best SKAT           |    |     |        | 0.17         | 0.17         |
|                | 1/5 1%                             | 3  | 26  | 2.4    | 0.12         | 0.16         |
|                | 0/5 1%                             | 4  | 27  | 1.9    | 0.17         | 0.17         |



|                 |                 |     |       |         |       |       |
|-----------------|-----------------|-----|-------|---------|-------|-------|
| <i>RAPGEF3</i>  | Best Burden     |     |       |         | 0.17  |       |
|                 | Best SKAT       |     |       |         |       | 0.23  |
| <i>ARHGEF7</i>  | 5/5             | 12  | 81    | 0.91    | 0.34  | 0.7   |
|                 | 5/5 + LofTee LC | 12  | 81    | 0.91    | 0.34  | 0.7   |
|                 | 1/5 1%          | 56  | 316   | 1.9     | 0.18  | 0.89  |
|                 | 0/5 1%          | 59  | 328   | 3.1     | 0.083 | 0.85  |
|                 | Best Burden     |     |       |         | 0.18  |       |
|                 | Best SKAT       |     |       |         |       | 0.95  |
| <i>TMEM161B</i> | LofTee          | 3   | 3     | -0.74   | 0.62  | 0.85  |
|                 | 16/16           | 3   | 3     | -0.74   | 0.62  | 0.85  |
|                 | 11/11           | 3   | 3     | -0.74   | 0.62  | 0.85  |
|                 | 5/5             | 10  | 16    | -4.6    | 0.095 | 0.82  |
|                 | 5/5 + LofTee LC | 10  | 16    | -4.6    | 0.061 | 0.72  |
|                 | 1/5 1%          | 27  | 204   | -2.4    | 0.15  | 0.98  |
|                 | 0/5 1%          | 29  | 206   | -2.1    | 0.18  | 0.98  |
|                 | Best Burden     |     |       |         | 0.21  |       |
|                 | Best SKAT       |     |       |         |       | 0.98  |
| <i>KDM7A</i>    | 5/5             | 7   | 17    | 1.1     | 0.49  | 0.12  |
|                 | 5/5 + LofTee LC | 8   | 18    | 0.9     | 0.34  | 0.064 |
|                 | 1/5 1%          | 39  | 207   | 0.063   | 0.8   | 0.28  |
|                 | 0/5 1%          | 53  | 324   | -0.017  | 0.9   | 0.41  |
|                 | Best Burden     |     |       |         | 0.74  |       |
|                 | Best SKAT       |     |       |         |       | 0.22  |
| <i>HNF1A</i>    | LofTee          | 1   | 1     | -0.18   | 0.67  | 0.67  |
|                 | 16/16           | 1   | 1     | -0.18   | 0.67  | 0.67  |
|                 | 11/11           | 15  | 35    | 2.5     | 0.11  | 0.046 |
|                 | 5/5             | 22  | 44    | 1.4     | 0.23  | 0.05  |
|                 | 5/5 + LofTee LC | 22  | 44    | 1.4     | 0.23  | 0.05  |
|                 | 1/5 1%          | 71  | 218   | 1.6     | 0.21  | 0.44  |
|                 | 0/5 1%          | 88  | 271   | 1.9     | 0.21  | 0.56  |
|                 | Best Burden     |     |       |         | 0.47  |       |
|                 | Best SKAT       |     |       |         |       | 0.22  |
| <i>TRDN</i>     | LofTee          | 19  | 41    | 0.1     | 0.75  | 0.81  |
|                 | 16/16           | 19  | 41    | 0.1     | 0.75  | 0.81  |
|                 | 11/11           | 19  | 41    | 0.1     | 0.75  | 0.81  |
|                 | 5/5             | 30  | 61    | 2.4     | 0.15  | 0.083 |
|                 | 5/5 + LofTee LC | 31  | 62    | 2.3     | 0.13  | 0.066 |
|                 | 1/5 1%          | 67  | 348   | 0.7     | 0.4   | 0.66  |
|                 | 0/5 1%          | 94  | 806   | 0.18    | 0.74  | 0.96  |
|                 | Best Burden     |     |       |         | 0.44  |       |
|                 | Best SKAT       |     |       |         |       | 0.27  |
| <i>RHBDD2</i>   | 5/5             | 6   | 14    | 2.6     | 0.11  | 0.097 |
|                 | 5/5 + LofTee LC | 6   | 14    | 2.6     | 0.11  | 0.097 |
|                 | 1/5 1%          | 27  | 45    | -0.0037 | 0.97  | 0.48  |
|                 | 0/5 1%          | 36  | 160   | 0.013   | 0.91  | 0.79  |
|                 | Best Burden     |     |       |         | 0.3   |       |
|                 | Best SKAT       |     |       |         |       | 0.27  |
| <i>NUMA1</i>    | LofTee          | 1   | 1     | 4.1     | 0.083 | 0.083 |
|                 | 16/16           | 1   | 1     | 4.1     | 0.083 | 0.083 |
|                 | 11/11           | 1   | 1     | 4.1     | 0.083 | 0.083 |
|                 | 5/5             | 25  | 128   | 2.4     | 0.23  | 0.19  |
|                 | 5/5 + LofTee LC | 25  | 128   | 2.4     | 0.22  | 0.19  |
|                 | 1/5 1%          | 200 | 1194  | -0.57   | 0.69  | 0.9   |
|                 | 0/5 1%          | 246 | 1534  | -0.84   | 0.57  | 0.95  |
|                 | Best Burden     |     |       |         | 0.28  |       |
|                 | Best SKAT       |     |       |         |       | 0.28  |
|                 | LofTee          | 3   | 10990 | 2.5     | 0.11  | 0.13  |
|                 | 16/16           | 3   | 10990 | 2.5     | 0.11  | 0.13  |
|                 | 11/11           | 4   | 10990 | 2.5     | 0.11  | 0.13  |
|                 | 5/5             | 4   | 10990 | 2.5     | 0.18  | 0.2   |
|                 | 5/5 + LofTee LC | 5   | 12005 | 2.2     | 0.14  | 0.16  |
|                 | 1/5 1%          | 6   | 12    | 0.068   | 0.79  | 0.24  |

CPSF7

|                |                                    |     |     |         |             |              |
|----------------|------------------------------------|-----|-----|---------|-------------|--------------|
|                | 0/5 1%<br>Best Burden<br>Best SKAT | 7   | 23  | 0.29    | 0.59<br>0.3 | 0.46<br>0.34 |
| <i>CCDC113</i> | LofTee                             | 1   | 2   | 1.      | 0.32        | 0.32         |
|                | 5/5                                | 7   | 24  | -0.077  | 0.78        | 0.11         |
|                | 5/5 + LofTee LC                    | 7   | 24  | -0.077  | 0.78        | 0.11         |
|                | 1/5 1%                             | 21  | 241 | -0.72   | 0.4         | 0.5          |
|                | 0/5 1%                             | 37  | 413 | -1.5    | 0.22        | 0.67         |
|                | Best Burden<br>Best SKAT           |     |     |         | 0.61        | 0.36         |
| <i>SLC16A2</i> | 5/5                                | 1   | 28  | -1.6    | 0.2         | 0.2          |
|                | 5/5 + LofTee LC                    | 1   | 28  | -1.6    | 0.2         | 0.2          |
|                | 1/5 1%                             | 12  | 54  | -0.058  | 0.81        | 0.15         |
|                | 0/5 1%                             | 15  | 63  | 0.031   | 0.86        | 0.14         |
|                | Best Burden<br>Best SKAT           |     |     |         | 0.49        | 0.37         |
|                |                                    |     |     |         |             | 0.37         |
| <i>SLC48A1</i> | 1/5 1%                             | 15  | 52  | 0.86    | 0.35        | 0.22         |
|                | 0/5 1%                             | 19  | 58  | 0.17    | 0.68        | 0.23         |
|                | Best Burden<br>Best SKAT           |     |     |         | 0.57        | 0.38         |
|                |                                    |     |     |         |             | 0.38         |
| <i>PHF12</i>   | LofTee                             | 2   | 2   | 0.2     | 0.65        | 0.44         |
|                | 16/16                              | 3   | 3   | 0.037   | 0.85        | 0.57         |
|                | 11/11                              | 14  | 24  | -0.82   | 0.36        | 0.12         |
|                | 5/5                                | 14  | 24  | -0.82   | 0.36        | 0.12         |
|                | 5/5 + LofTee LC                    | 14  | 24  | -0.82   | 0.36        | 0.12         |
|                | 1/5 1%                             | 28  | 71  | -0.91   | 0.34        | 0.26         |
|                | 0/5 1%                             | 32  | 82  | -1.6    | 0.21        | 0.26         |
|                | Best Burden<br>Best SKAT           |     |     |         | 0.62        | 0.39         |
|                |                                    |     |     |         |             | 0.39         |
| <i>HLCS</i>    | LofTee                             | 6   | 7   | 0.57    | 0.45        | 0.077        |
|                | 16/16                              | 6   | 7   | 0.57    | 0.45        | 0.077        |
|                | 11/11                              | 21  | 34  | 0.38    | 0.6         | 0.29         |
|                | 5/5                                | 25  | 44  | 1.5     | 0.32        | 0.26         |
|                | 5/5 + LofTee LC                    | 25  | 44  | 1.5     | 0.27        | 0.22         |
|                | 1/5 1%                             | 64  | 283 | -0.16   | 0.75        | 0.69         |
|                | 0/5 1%                             | 93  | 714 | 0.63    | 0.5         | 0.2          |
|                | Best Burden<br>Best SKAT           |     |     |         | 0.79        | 0.4          |
|                |                                    |     |     |         |             | 0.4          |
| <i>ING3</i>    | 11/11                              | 2   | 2   | 0.61    | 0.44        | 0.21         |
|                | 5/5                                | 5   | 5   | -0.049  | 0.83        | 0.53         |
|                | 5/5 + LofTee LC                    | 5   | 5   | -0.049  | 0.83        | 0.53         |
|                | 1/5 1%                             | 14  | 19  | -0.38   | 0.54        | 0.35         |
|                | 0/5 1%                             | 16  | 42  | 0.59    | 0.44        | 0.12         |
|                | Best Burden<br>Best SKAT           |     |     |         | 0.9         | 0.41         |
| <i>SLC30A8</i> | LofTee                             | 8   | 15  | 7.3e-05 | 0.99        | 0.89         |
|                | 16/16                              | 8   | 15  | 7.3e-05 | 0.99        | 0.89         |
|                | 11/11                              | 8   | 15  | 7.3e-05 | 0.99        | 0.89         |
|                | 5/5                                | 23  | 69  | -2.4    | 0.12        | 0.83         |
|                | 5/5 + LofTee LC                    | 23  | 69  | -2.4    | 0.12        | 0.83         |
|                | 1/5 1%                             | 36  | 137 | -0.91   | 0.34        | 0.67         |
|                | 0/5 1%                             | 46  | 152 | -1.2    | 0.27        | 0.69         |
|                | Best Burden<br>Best SKAT           |     |     |         | 0.41        | 0.99         |
|                |                                    |     |     |         |             | 0.99         |
|                | LofTee                             | 6   | 7   | 3.      | 0.081       | 0.21         |
|                | 16/16                              | 9   | 13  | 2.1     | 0.15        | 0.55         |
|                | 11/11                              | 32  | 44  | -0.067  | 0.8         | 0.9          |
|                | 5/5                                | 37  | 49  | 0.073   | 0.85        | 0.84         |
|                | 5/5 + LofTee LC                    | 38  | 50  | 0.038   | 0.84        | 0.79         |
|                | 1/5 1%                             | 112 | 523 | -0.16   | 0.69        | 0.66         |
|                | 0/5 1%                             | 133 | 654 | -0.47   | 0.49        | 0.64         |
|                | Best Burden<br>Best SKAT           |     |     |         | 0.41        | 0.41         |
|                |                                    |     |     |         |             | 0.41         |

|               | Best SKAT       |    |     |       |      | 0.76 |
|---------------|-----------------|----|-----|-------|------|------|
| <i>IL18BP</i> | LofTee          | 1  | 1   | -0.38 | 0.54 | 0.54 |
|               | 16/16           | 1  | 1   | -0.38 | 0.54 | 0.54 |
|               | 11/11           | 1  | 1   | -0.38 | 0.54 | 0.54 |
|               | 5/5             | 42 | 200 | -0.33 | 0.57 | 0.74 |
|               | 5/5 + LofTee LC | 42 | 200 | -0.33 | 0.57 | 0.74 |
|               | 1/5 1%          | 82 | 633 | -2.1  | 0.15 | 0.53 |

**Supplementary Table 8: Evaluation of association signals in GHS.** Shown are results from the precomputed gene-level analysis of the GHS dataset. As custom analytical results were unavailable, the precise masks and testing methodologies are only broadly similar to those used in our exome-wide gene-level analysis. Genes are sorted in order of increasing *p*-value in the GHS dataset, reading from left to right and then top to bottom. The top 50 genes were advanced for analysis in the GHS dataset, but only results for the top 44 genes were available. Mask: the grouping of alleles used in the GHS analysis; Var: the number of alleles in the mask; CAF: the combined allele frequency of all alleles in the mask; OR: the aggregate odds-ratio calculated from a burden analysis of the mask; Burden: the *p*-value from a burden analysis of the mask. M1: predicted loss-of-function variants, according to the Variant Effect Predictor, with MAF<1% (similar to the LofTee mask but without an additional filter on LofTee and with an additional filter on MAF); M2: nonsynonymous variants predicted deleterious by 5/5 prediction algorithms with MAF<1% (similar to the 5/5 mask but with an additional filter on MAF); M3: all nonsynonymous variants predicted deleterious by ≥1/5 bioinformatic algorithms with MAF<1% (similar to the 1/5 1% mask); M4: all nonsynonymous variants with MAF<1% (similar to the 0/5 1% mask); Best: the minimum *p*-value calculated across all four masks, as described in **Methods**.

| Gene            | Mask | Var | CAF     | OR   | Burden | Gene           | Mask | Var | CAF     | OR   | Burden |
|-----------------|------|-----|---------|------|--------|----------------|------|-----|---------|------|--------|
| <i>MC4R</i>     | M1   | 12  | 0.00035 | 2.3  | 0.022  | <i>SLC30A8</i> | M1   | 13  | 0.00062 | 0.77 | 0.44   |
|                 | M2   | 58  | 0.0021  | 1.6  | 0.0018 |                | M2   | 46  | 0.0018  | 0.61 | 0.013  |
|                 | M3   | 86  | 0.0039  | 1.2  | 0.057  |                | M3   | 79  | 0.0037  | 0.8  | 0.088  |
|                 | M4   | 94  | 0.0041  | 1.2  | 0.059  |                | M4   | 94  | 0.004   | 0.81 | 0.085  |
|                 | Best |     |         |      | 0.0058 |                | Best |     |         |      | 0.043  |
| <i>ANGPTL6</i>  | M1   | 18  | 0.0015  | 1.2  | 0.23   | <i>PAM</i>     | M1   | 18  | 0.00025 | 1.4  | 0.41   |
|                 | M2   | 59  | 0.0031  | 0.83 | 0.17   |                | M2   | 98  | 0.011   | 1.2  | 0.032  |
|                 | M3   | 111 | 0.0062  | 0.79 | 0.019  |                | M3   | 209 | 0.016   | 1.1  | 0.11   |
|                 | M4   | 127 | 0.007   | 0.82 | 0.034  |                | M4   | 220 | 0.016   | 1.1  | 0.17   |
|                 | Best |     |         |      | 0.058  |                | Best |     |         |      | 0.096  |
| <i>MGAT4C</i>   | M1   | 8   | 0.00012 | 4.   | 0.032  | <i>PDF</i>     | M1   | 9   | 0.00015 | 0.41 | 0.25   |
|                 | M2   | 34  | 0.0009  | 0.75 | 0.29   |                | M2   | 9   | 0.00015 | 0.41 | 0.25   |
|                 | M3   | 88  | 0.0051  | 0.9  | 0.35   |                | M3   | 46  | 0.0012  | 0.67 | 0.085  |
|                 | M4   | 96  | 0.0054  | 0.92 | 0.42   |                | M4   | 50  | 0.0014  | 0.8  | 0.28   |
|                 | Best |     |         |      | 0.1    |                | Best |     |         |      | 0.18   |
| <i>DPH7</i>     | M1   | 18  | 0.00019 | 2.4  | 0.066  | <i>STAT4</i>   | M1   | 6   | 9.2e-05 | 1.7  | 0.43   |
|                 | M2   | 51  | 0.001   | 0.9  | 0.66   |                | M2   | 43  | 0.0015  | 0.94 | 0.75   |
|                 | M3   | 94  | 0.005   | 1.1  | 0.64   |                | M3   | 83  | 0.0089  | 0.86 | 0.076  |
|                 | M4   | 127 | 0.0064  | 1.1  | 0.5    |                | M4   | 95  | 0.0091  | 0.88 | 0.12   |
|                 | Best |     |         |      | 0.22   |                | Best |     |         |      | 0.24   |
| <i>TRDN</i>     | M1   | 53  | 0.0033  | 0.94 | 0.67   | <i>HNF1A</i>   | M1   | 11  | 0.0024  | 1.2  | 0.2    |
|                 | M2   | 73  | 0.0042  | 0.92 | 0.49   |                | M2   | 59  | 0.0041  | 1.2  | 0.09   |
|                 | M3   | 185 | 0.01    | 0.89 | 0.13   |                | M3   | 141 | 0.0091  | 1.1  | 0.18   |
|                 | M4   | 230 | 0.012   | 0.89 | 0.09   |                | M4   | 163 | 0.01    | 1.1  | 0.42   |
|                 | Best |     |         |      | 0.25   |                | Best |     |         |      | 0.26   |
| <i>TMEM161B</i> | M1   | 8   | 0.00017 | 1.1  | 0.9    | <i>PRSS54</i>  | M1   | 10  | 0.00013 | 0.56 | 0.46   |
|                 | M2   | 35  | 0.00086 | 1.   | 0.97   |                | M2   | 22  | 0.00085 | 0.63 | 0.11   |
|                 | M3   | 82  | 0.013   | 0.89 | 0.099  |                | M3   | 68  | 0.011   | 0.88 | 0.084  |
|                 | M4   | 83  | 0.013   | 0.89 | 0.094  |                | M4   | 92  | 0.011   | 0.89 | 0.1    |
|                 | Best |     |         |      | 0.26   |                | Best |     |         |      | 0.27   |
| <i>MIEF1</i>    | M1   | 10  | 0.00026 | 2.   | 0.11   | <i>KDM7A</i>   | M1   | 6   | 0.0001  | 1.8  | 0.42   |
|                 | M2   | 55  | 0.012   | 1.1  | 0.11   |                | M2   | 39  | 0.0011  | 1.2  | 0.4    |
|                 | M3   | 127 | 0.022   | 1.   | 0.36   |                | M3   | 132 | 0.0094  | 1.1  | 0.2    |
|                 | M4   | 133 | 0.022   | 1.1  | 0.31   |                | M4   | 167 | 0.01    | 1.1  | 0.11   |
|                 | Best |     |         |      | 0.29   |                | Best |     |         |      | 0.34   |

|               |      |     |         |      |      |              |      |     |         |      |      |
|---------------|------|-----|---------|------|------|--------------|------|-----|---------|------|------|
| <i>OR2M4</i>  | M1   | 7   | 8.1e-05 | 2.9  | 0.14 | <i>TDRD5</i> | M1   | 5   | 4.1e-05 | 0.65 | 0.7  |
|               | M2   | 10  | 0.00017 | 1.2  | 0.75 |              | M2   | 23  | 0.0071  | 1.1  | 0.46 |
|               | M3   | 64  | 0.0082  | 1.   | 0.56 |              | M3   | 124 | 0.0096  | 1.   | 0.72 |
|               | M4   | 89  | 0.011   | 0.99 | 0.94 |              | M4   | 187 | 0.017   | 1.1  | 0.16 |
|               | Best |     |         |      | 0.41 |              | Best |     |         |      | 0.46 |
| <i>NT5DC1</i> | M1   | 12  | 0.00053 | 1.   | 0.91 | <i>NUMA1</i> | M1   | 25  | 0.00039 | 1.3  | 0.49 |
|               | M2   | 37  | 0.0015  | 1.2  | 0.3  |              | M2   | 194 | 0.013   | 0.96 | 0.57 |
|               | M3   | 80  | 0.007   | 1.1  | 0.35 |              | M3   | 504 | 0.041   | 0.97 | 0.47 |
|               | M4   | 104 | 0.0079  | 1.1  | 0.17 |              | M4   | 582 | 0.058   | 0.96 | 0.17 |
|               | Best |     |         |      | 0.47 |              | Best |     |         |      | 0.48 |

**Supplementary Table 9: Evaluation of association signal concordance in CHARGE and GHS.** For each of the 50 genes from our exome sequence analysis with lowest gene-level  $p$ -value, we compared the direction of effect from our burden analysis to those in the CHARGE and GHS datasets. In this analysis, we only included genes which achieved  $p < 0.05$  for the burden test (i.e. we excluded genes significant under SKAT but not the burden test). For each gene, we took the direction of effect from the mask achieving the lowest  $p$ -value and compared it to the direction of effect in the analogous mask in CHARGE or GHS (for GHS, as discussed in **Methods**, we matched the LofTee mask to M1; the 15/15, 10/10, 5/5, and 5/5+LofTee LC mask to M2; the 1/5 1% mask to M3; and the 0/5 1% mask to M4). Best Test,  $\log(OR)$ , and P: the test with the lowest  $p$ -value within the chosen mask as well as the logarithm of the estimated odds-ratio and  $p$ -value; for genes in which the lowest  $p$ -value is achieved by the SKAT test, no direction of effect is shown and no comparison with CHARGE and GHS is performed (genes achieving  $p < 0.05$  for both SKAT and burden analyses are shown as two separate rows of the table). CHARGE Var (CAC, Score, P): the number of alleles (combined allele count, score statistic, and  $p$ -value) in the analogous mask in the CHARGE analysis. GHS Var (CAF,  $\log(OR)$ , P): the number of alleles (combined allele frequency, logarithm of odds-ratio,  $p$ -value) in the matched mask in the GHS analysis.

| Gene           | Best            |        |            |          | CHARGE |       |                |        | GHS |          |                |         |
|----------------|-----------------|--------|------------|----------|--------|-------|----------------|--------|-----|----------|----------------|---------|
|                | Mask            | Test   | $\log(OR)$ | P        | Var    | CAC   | Score          | P      | Var | CAF      | $\log(OR)$     | P       |
| <i>MC4R</i>    | 5/5 + LofTee LC | Burden | 0.726      | 8.46e-11 | 12     | 18    | <b>4.75</b>    | 0.0294 | 58  | 0.00212  | <b>0.477</b>   | 0.00184 |
| <i>PAM</i>     | 5/5 + LofTee LC | Burden | 0.269      | 4.28e-09 | 40     | 1201  | <b>1.86</b>    | 0.173  | 98  | 0.0106   | <b>0.153</b>   | 0.0324  |
| <i>SLC30A8</i> | 1/5 1%          | Burden | -0.514     | 4.7e-08  | 36     | 137   | <b>-0.912</b>  | 0.34   | 79  | 0.0037   | <b>-0.223</b>  | 0.0881  |
| <i>BICD1</i>   | 0/5 1%          | SKAT   | -          | 2.83e-06 | 75     | 174   | -              | 0.886  | -   | -        | -              | -       |
| <i>HNF1A</i>   | 0/5 1%          | SKAT   | -          | 8.26e-06 | 88     | 271   | -              | 0.471  | -   | -        | -              | -       |
| <i>UBE2NL</i>  | 5/5 + LofTee LC | Burden | 2.54       | 1.03e-05 | 3      | 4     | <b>5.7</b>     | 0.017  | -   | -        | -              | -       |
| <i>MAP3K15</i> | 0/5 1%          | Burden | -0.163     | 1.38e-05 | 92     | 493   | <b>-2.66</b>   | 0.103  | -   | -        | -              | -       |
| <i>NUMA1</i>   | 5/5             | SKAT   | -          | 2.47e-05 | 67     | 326   | -              | 0.36   | -   | -        | -              | -       |
| <i>ING3</i>    | 1/5 1%          | Burden | 0.829      | 3.1e-05  | 14     | 19    | -0.382         | 0.536  | 44  | 0.00125  | -0.187         | 0.387   |
| <i>IGFBPL1</i> | 1/5 1%          | Burden | -0.573     | 3.59e-05 | 18     | 236   | 1.48           | 0.224  | 41  | 0.00359  | <b>-0.0434</b> | 0.733   |
| <i>MGAT4C</i>  | 5/5 + LofTee LC | Burden | 1.14       | 4.35e-05 | 11     | 15    | <b>4.76</b>    | 0.0291 | 34  | 0.000904 | -0.285         | 0.285   |
| <i>PTPRC</i>   | 0/5 1%          | Burden | 0.21       | 7.35e-05 | 124    | 848   | <b>0.284</b>   | 0.594  | 255 | 0.0232   | <b>0.0266</b>  | 0.595   |
| <i>TMEM216</i> | LofTee          | Burden | 0.0803     | 8.36e-05 | 4      | 10990 | <b>2.61</b>    | 0.106  | 7   | 0.000183 | <b>0.308</b>   | 0.587   |
| <i>HLCS</i>    | 5/5 + LofTee LC | Burden | 0.648      | 9.84e-05 | 27     | 48    | <b>1.52</b>    | 0.218  | 49  | 0.00149  | -0.121         | 0.54    |
| <i>SOCS2</i>   | 0/5 1%          | Burden | 0.671      | 0.000102 | 7      | 13    | -0.373         | 0.542  | 42  | 0.00109  | <b>0.291</b>   | 0.193   |
| <i>TRDN</i>    | 0/5 1%          | Burden | 0.247      | 0.000114 | 94     | 806   | <b>0.184</b>   | 0.668  | 230 | 0.0119   | -0.12          | 0.0902  |
| <i>TCEA1</i>   | 5/5 + LofTee LC | Burden | -2.36      | 0.000157 | 4      | 4     | <b>-1.09</b>   | 0.296  | 19  | 0.000274 | <b>-0.375</b>  | 0.422   |
| <i>KDM7A</i>   | 0/5 1%          | Burden | 0.315      | 0.000157 | 53     | 324   | -0.0166        | 0.898  | 167 | 0.0104   | <b>0.115</b>   | 0.113   |
| <i>PRSS54</i>  | 11/11           | SKAT   | -          | 0.000183 | 1      | 1     | -              | 0.461  | -   | -        | -              | -       |
| <i>DPH7</i>    | 5/5 + LofTee LC | SKAT   | -          | 0.000204 | 16     | 51    | -              | 0.789  | -   | -        | -              | -       |
| <i>DHRS13</i>  | 1/5 1%          | SKAT   | -          | 0.000211 | 44     | 118   | -              | 0.463  | -   | -        | -              | -       |
| <i>ANGPTL6</i> | 5/5 + LofTee LC | SKAT   | -          | 0.000222 | 22     | 45    | -              | 0.997  | -   | -        | -              | -       |
| <i>OR2M4</i>   | 5/5 + LofTee LC | Burden | -0.59      | 0.000248 | 7      | 56    | 0.526          | 0.468  | 10  | 0.000173 | 0.174          | 0.75    |
| <i>DGKK</i>    | 0/5 1%          | SKAT   | -          | 0.000252 | 71     | 304   | -              | 0.961  | -   | -        | -              | -       |
| <i>SLC16A2</i> | 0/5 1%          | Burden | -0.0674    | 0.000266 | 15     | 63    | 0.031          | 0.86   | -   | -        | -              | -       |
| <i>HYAL2</i>   | 1/5 1%          | Burden | -0.687     | 0.000268 | 28     | 48    | <b>-0.29</b>   | 0.59   | 91  | 0.00391  | 0.003          | 0.979   |
| <i>MAGEB5</i>  | 0/5 1%          | Burden | -0.635     | 0.000276 | 18     | 34    | <b>-0.443</b>  | 0.506  | -   | -        | -              | -       |
| <i>FLCN</i>    | 1/5 1%          | Burden | -0.354     | 0.000277 | 19     | 57    | <b>-0.0389</b> | 0.844  | 138 | 0.00907  | <b>-0.025</b>  | 0.754   |
| <i>DHX9</i>    | 5/5 + LofTee LC | Burden | -2.31      | 0.000314 | 5      | 6     | 0.514          | 0.473  | 27  | 0.00375  | 0.128          | 0.293   |
| <i>MIEF1</i>   | 1/5 1%          | Burden | 0.161      | 0.000317 | 35     | 551   | <b>0.121</b>   | 0.728  | 127 | 0.0216   | <b>0.0469</b>  | 0.363   |

|                 |                 |        |        |          |     |     |                 |        |     |          |                |        |
|-----------------|-----------------|--------|--------|----------|-----|-----|-----------------|--------|-----|----------|----------------|--------|
| <i>MAGEE2</i>   | 0/5 1%          | Burden | 0.0655 | 0.000334 | 57  | 230 | -0.298          | 0.585  | -   | -        | -              | -      |
| <i>ARHGGEF7</i> | 0/5 1%          | SKAT   | -      | 0.000338 | 60  | 330 | -               | 0.835  | -   | -        | -              | -      |
| <i>PDF</i>      | 0/5 1%          | SKAT   | -      | 0.000361 | 7   | 21  | -               | 0.754  | -   | -        | -              | -      |
| <i>RUVBL2</i>   | 1/5 1%          | Burden | 0.458  | 0.000433 | 25  | 286 | <b>0.00663</b>  | 0.935  | 83  | 0.00684  | -0.0402        | 0.66   |
| <i>C19orf66</i> | 1/5 1%          | Burden | 0.529  | 0.000483 | 22  | 52  | <b>0.00353</b>  | 0.953  | 61  | 0.00224  | <b>0.12</b>    | 0.442  |
| <i>SLC48A1</i>  | 1/5 1%          | Burden | 1.17   | 0.000526 | 15  | 52  | <b>0.861</b>    | 0.353  | 38  | 0.00149  | <b>0.0583</b>  | 0.76   |
| <i>MEST</i>     | 1/5 1%          | Burden | 0.908  | 0.000573 | 16  | 114 | <b>0.0777</b>   | 0.78   | 41  | 0.00128  | -0.0574        | 0.782  |
| <i>ANKS3</i>    | 1/5 1%          | Burden | -0.213 | 0.000617 | 69  | 400 | 2.43            | 0.119  | 227 | 0.0131   | 0.0373         | 0.566  |
| <i>TDRD5</i>    | 5/5 + LofTee LC | Burden | -0.395 | 0.000648 | 16  | 156 | 0.00304         | 0.956  | 23  | 0.00709  | 0.0658         | 0.457  |
| <i>LRRTM3</i>   | 1/5 1%          | SKAT   | -      | 0.000678 | 32  | 139 | -               | 0.476  | -   | -        | -              | -      |
| <i>STAT4</i>    | 11/11           | SKAT   | -      | 0.000706 | 7   | 24  | -               | 0.422  | -   | -        | -              | -      |
| <i>LRRTM3</i>   | 1/5 1%          | Burden | 0.367  | 0.00078  | 32  | 139 | <b>5.08</b>     | 0.0242 | 83  | 0.00642  | -0.0624        | 0.514  |
| <i>NT5DC1</i>   | 1/5 1%          | SKAT   | -      | 0.000879 | 42  | 176 | -               | 0.369  | -   | -        | -              | -      |
| <i>PPP3CA</i>   | 1/5 1%          | SKAT   | -      | 0.000908 | 19  | 27  | -               | 0.747  | -   | -        | -              | -      |
| <i>MBD3</i>     | 5/5 + LofTee LC | Burden | 1.37   | 0.00111  | 4   | 10  | -0.843          | 0.359  | 7   | 9.15e-05 | <b>0.347</b>   | 0.635  |
| <i>RXRG</i>     | 5/5 + LofTee LC | Burden | 1.22   | 0.00116  | 7   | 9   | -1.05           | 0.307  | 32  | 0.000844 | <b>0.276</b>   | 0.273  |
| <i>STAT4</i>    | 1/5 1%          | Burden | -0.39  | 0.0015   | 40  | 382 | <b>-0.095</b>   | 0.758  | 83  | 0.00887  | <b>-0.146</b>  | 0.0762 |
| <i>TMEM161B</i> | 1/5 1%          | Burden | 0.445  | 0.0016   | 27  | 204 | -2.41           | 0.121  | 82  | 0.0129   | -0.111         | 0.0991 |
| <i>RHBDD2</i>   | 5/5 + LofTee LC | SKAT   | -      | 0.0019   | 6   | 14  | -               | 0.097  | -   | -        | -              | -      |
| <i>PDF</i>      | 0/5 1%          | Burden | -0.549 | 0.00247  | 7   | 21  | <b>-0.0179</b>  | 0.894  | 50  | 0.00144  | <b>-0.22</b>   | 0.279  |
| <i>ABCB11</i>   | 1/5 1%          | Burden | 0.188  | 0.00275  | 112 | 523 | -0.159          | 0.69   | 229 | 0.0113   | -0.00955       | 0.894  |
| <i>NUMA1</i>    | 5/5             | Burden | 0.13   | 0.00481  | 67  | 326 | <b>0.221</b>    | 0.638  | 194 | 0.0129   | -0.0378        | 0.571  |
| <i>HNF1A</i>    | 1/5 1%          | Burden | 0.206  | 0.00504  | 71  | 218 | <b>1.56</b>     | 0.212  | 141 | 0.00906  | <b>0.104</b>   | 0.184  |
| <i>PDX1</i>     | 11/11           | Burden | 1.55   | 0.00546  | 1   | 4   | <b>1.29</b>     | 0.257  | 30  | 0.00314  | <b>0.126</b>   | 0.339  |
| <i>ANGPTL6</i>  | 5/5 + LofTee LC | Burden | -0.315 | 0.013    | 22  | 45  | <b>-0.658</b>   | 0.417  | 59  | 0.00314  | <b>-0.188</b>  | 0.168  |
| <i>DHRS13</i>   | 16/16           | Burden | 0.508  | 0.0215   | 7   | 32  | <b>0.457</b>    | 0.499  | 34  | 0.0013   | -0.0998        | 0.637  |
| <i>RHBDD2</i>   | 1/5 1%          | Burden | -0.327 | 0.0223   | 27  | 45  | <b>-0.00373</b> | 0.951  | 83  | 0.00649  | 0.0363         | 0.695  |
| <i>DGKK</i>     | 0/5 1%          | Burden | -0.148 | 0.0254   | 71  | 304 | <b>-0.0132</b>  | 0.909  | -   | -        | -              | -      |
| <i>NT5DC1</i>   | 1/5 1%          | Burden | 0.194  | 0.0298   | 42  | 176 | <b>0.0101</b>   | 0.92   | 80  | 0.00699  | <b>0.0825</b>  | 0.347  |
| <i>BICD1</i>    | 0/5 1%          | Burden | -0.154 | 0.0448   | 75  | 174 | <b>-2.13</b>    | 0.144  | 181 | 0.00566  | <b>-0.0651</b> | 0.519  |
| <i>PPP3CA</i>   | 0/5 1%          | Burden | -0.294 | 0.0483   | 19  | 27  | 0.0708          | 0.79   | 48  | 0.000955 | <b>-0.19</b>   | 0.449  |

**Supplementary Table 10: Genes used in gene set analysis.** We selected various sets of genes, as described in **Methods**, to test for stronger-than-expected gene-level associations. Shown are the set of genes used in each gene set.

[See separate Excel file]

**Supplementary Table 11: Genes within T2D GWAS loci with nominally significant gene-level associations.** Shown are all genes within established T2D GWAS loci that achieved a  $p < 0.05$  for the minimum  $p$ -value burden analysis. Columns are analogous to those in **Supplementary Table 5**. Locus: an identifier for the T2D GWAS locus containing the gene.

| Gene         | Locus     | Best Result |          | Burden |          |          |          | SKAT     |          |
|--------------|-----------|-------------|----------|--------|----------|----------|----------|----------|----------|
|              |           | Var         | CAF      | Min P  |          | Weighted |          | Min P    | Weighted |
|              |           |             |          | OR     | P        | OR       | P        | P        | P        |
| MC4R         | MC4R      | 41          | 0.00795  | 2.07   | 2.74e-10 | 2.2      | 4.81e-09 | 7.74e-08 | 3.48e-08 |
| PAM          | PAM       | 79          | 0.0493   | 1.31   | 1.58e-08 | 1.44     | 2.2e-09  | 1.53e-07 | 7.03e-08 |
| SLC30A8      | SLC30A8   | 86          | 0.0116   | 0.598  | 1.85e-07 | 0.397    | 1.29e-08 | 0.00011  | 0.000221 |
| MNT          | SRR       | 105         | 0.00939  | 0.708  | 0.00131  | 0.444    | 0.0151   | 0.962    | 0.922    |
| ZFP1         | BCAR1     | 120         | 0.0134   | 0.762  | 0.00664  | 0.552    | 0.00755  | 0.157    | 0.0561   |
| SLC30A3      | GCKR      | 74          | 0.00823  | 1.44   | 0.00699  | 2.19     | 0.00808  | 0.189    | 0.00168  |
| RASGRP1      | RASGRP1   | 22          | 0.000812 | 3.1    | 0.00879  | 1.63     | 0.123    | 0.856    | 0.693    |
| TH           | IGF2      | 35          | 0.00223  | 0.509  | 0.00879  | 0.641    | 0.003    | 0.0601   | 0.0121   |
| WFS1         | WFS1      | 120         | 0.146    | 1.09   | 0.0118   | 1.12     | 0.000944 | 0.0261   | 0.00167  |
| ACADS        | HNF1A     | 53          | 0.00684  | 1.44   | 0.013    | 1.41     | 0.0175   | 0.472    | 0.719    |
| NUDCD3       | GCK       | 60          | 0.0048   | 1.5    | 0.013    | 1.77     | 0.0239   | 0.825    | 0.758    |
| FSCN3        | GCC1/PAX4 | 35          | 0.0029   | 1.7    | 0.0145   | 1.25     | 0.115    | 0.123    | 0.237    |
| BCL11A       | BCL11A    | 115         | 0.00737  | 1.35   | 0.0166   | 1.73     | 0.0466   | 0.413    | 0.263    |
| INS-IGF2     | IGF2      | 43          | 0.00728  | 0.743  | 0.0187   | 0.462    | 0.0708   | 0.239    | 0.179    |
| TMEM19       | LGR5      | 73          | 0.0164   | 1.25   | 0.0213   | 1.52     | 0.00955  | 0.154    | 0.0752   |
| PDX1         | PDX1      | 11          | 0.000371 | 4.71   | 0.0214   | 3.46     | 0.000166 | 0.165    | 0.0573   |
| SYN2         | PPARG     | 36          | 0.00167  | 0.5    | 0.0214   | 0.689    | 0.138    | 0.556    | 0.274    |
| HNF1A        | HNF1A     | 131         | 0.0184   | 1.23   | 0.0219   | 1.47     | 0.0125   | 3.62e-05 | 0.00106  |
| IGF2         | IGF2      | 53          | 0.00457  | 0.66   | 0.0235   | 0.264    | 0.0912   | 0.867    | 0.649    |
| PHLPP1       | BCL2      | 271         | 0.0501   | 0.898  | 0.0236   | 0.822    | 0.156    | 0.261    | 0.182    |
| PAX4         | GCC1/PAX4 | 11          | 0.00151  | 2.16   | 0.0237   | 1.14     | 0.176    | 0.342    | 0.34     |
| HIBADH       | JAZF1     | 65          | 0.00459  | 1.38   | 0.0265   | 1.98     | 0.0551   | 0.255    | 0.24     |
| POLM         | GCK       | 180         | 0.0597   | 1.12   | 0.0266   | 1.1      | 0.101    | 0.704    | 0.379    |
| MEF2B        | CILP2     | 20          | 0.00162  | 1.92   | 0.0294   | 1.35     | 0.349    | 0.698    | 0.7      |
| VPS33B       | PRC1      | 23          | 0.0013   | 1.97   | 0.0306   | 1.21     | 0.193    | 0.025    | 0.577    |
| PLEKHH2      | THADA     | 146         | 0.0185   | 1.21   | 0.031    | 1.22     | 0.0167   | 0.165    | 0.0441   |
| CCND2        | CCND2     | 50          | 0.00408  | 1.47   | 0.0329   | 1.34     | 0.741    | 0.0632   | 0.0971   |
| MYCBP        | MACF1     | 26          | 0.00339  | 0.643  | 0.0344   | 0.593    | 0.0373   | 0.0999   | 0.0653   |
| FAM135A      | C6orf57   | 7           | 0.000348 | 4.39   | 0.0371   | 1.08     | 0.46     | 0.0627   | 0.113    |
| DNLZ         | GPSM1     | 40          | 0.00821  | 1.32   | 0.0373   | 1.77     | 0.0613   | 0.386    | 0.159    |
| ATG16L2      | ARAP1     | 166         | 0.0293   | 1.17   | 0.038    | 1.26     | 0.0101   | 0.982    | 0.868    |
| UBE2E2       | UBE2E2    | 23          | 0.00371  | 1.5    | 0.0391   | 1.51     | 0.0355   | 0.879    | 0.733    |
| BORCS8-MEF2B | CILP2     | 21          | 0.00165  | 1.96   | 0.0397   | 1.36     | 0.275    | 0.888    | 0.634    |
| ATXN7        | PSMD6     | 199         | 0.106    | 1.08   | 0.0428   | 1.12     | 0.0192   | 0.0651   | 0.0288   |
| LPP          | LPP       | 160         | 0.0284   | 0.855  | 0.0432   | 0.754    | 0.00952  | 0.592    | 0.132    |
| ZNF14        | CILP2     | 106         | 0.0109   | 0.794  | 0.0432   | 0.728    | 0.0392   | 0.911    | 0.842    |
| FAH          | ZFAND6    | 119         | 0.0447   | 1.15   | 0.0437   | 1.16     | 0.0399   | 0.00492  | 0.00104  |
| PHGDH        | NOTCH2    | 50          | 0.0115   | 0.791  | 0.0445   | 0.792    | 0.0304   | 0.576    | 0.233    |
| GLP1R        | KCNK16    | 17          | 0.00116  | 1.97   | 0.0465   | 1.72     | 0.0194   | 0.0738   | 0.0171   |
| ST20-MTHFS   | ZFAND6    | 48          | 0.00631  | 0.742  | 0.0468   | 0.78     | 0.31     | 0.818    | 0.587    |

**Supplementary Table 12: Sample and variant counts for imputed GWAS analysis.** Shown are the sample subgroups with SNP array data analyzed as part of the imputed GWAS analysis. Subgroup, Ancestry, Sequence tech: exome sequencing subgroup characteristics. SNP array: technology used for imputed GWAS genotyping. Samples (Cases, Ctrl): Number of samples (T2D cases, controls) included in imputed GWAS analysis. Variants: Number of variants passing quality control and included in imputed GWAS analysis. Prior to analysis, all subgroups had genotypes imputed from the 1000G Phase 3 reference panel.

| Subgroup     | Ancestry         | Sequence tech | SNP array                  | Samples | Cases | Ctrl | Variants   |
|--------------|------------------|---------------|----------------------------|---------|-------|------|------------|
| Wake Forest  | African-American | Agilent       | Affy6                      | 1053    | 531   | 522  | 27,973,694 |
| JHS          | African-American | Agilent       | Affy6                      | 989     | 513   | 476  | 27,748,674 |
| BioMe        | African-American | Illumina      | G4L                        | 2518    | 1233  | 1285 | 26,084,594 |
| Singapore    | East-Asian       | Agilent       | Illumina610/Illumina1Mdov3 | 1077    | 591   | 486  | 10,897,305 |
| Singapore    | East-Asian       | Illumina      | G4L                        | 1969    | 985   | 984  | 9,209,756  |
| KARE         | East-Asian       | Agilent       | Affy5                      | 1096    | 567   | 529  | 7,770,075  |
| SNUH         | East-Asian       | Illumina      | G4L                        | 917     | 474   | 443  | 8,839,178  |
| Hong Kong    | East-Asian       | Illumina      | G4L                        | 960     | 481   | 479  | 9,231,055  |
| GoT2D        | European         | Agilent       | HumanOmni2.5               | 2657    | 1326  | 1331 | 17,692,443 |
| METSIM       | European         | Agilent       | HumanOmni2.5               | 970     | 494   | 476  | 14,135,914 |
| Ashkenazi    | European         | Agilent       | Illumina Cardio-MetaboChip | 732     | 359   | 373  | 2,602,793  |
| GoDARTS      | European         | Illumina      | G4L                        | 1886    | 941   | 945  | 12,197,555 |
| FHS          | European         | Illumina      | G4L                        | 973     | 584   | 389  | 10,939,434 |
| SIGMA        | Latino           | Agilent       | HumanOmni2.5               | 3542    | 1712  | 1830 | 35,256,845 |
| SIGMA        | Latino           | Illumina      | G4L                        | 5851    | 3020  | 2831 | 19,591,358 |
| Starr County | Hispanic         | Agilent       | Affy6                      | 1383    | 673   | 710  | 20,401,781 |
| Starr County | Hispanic         | Illumina      | G4L                        | 933     | 608   | 325  | 16,157,686 |
| San Antonio  | Hispanic         | Agilent       | Illumina Cardio-MetaboChip | 445     | 202   | 243  | 2,996,739  |
| Singapore    | South-Asian      | Agilent       | Illumina610                | 1112    | 576   | 536  | 14,471,389 |
| Singapore    | South-Asian      | Illumina      | G4L                        | 1932    | 882   | 1050 | 11,989,365 |
| LOLIPOP      | South-Asian      | Agilent       | Illumina610                | 1199    | 599   | 600  | 15,256,850 |
| PGR          | South-Asian      | Illumina      | G4L                        | 1718    | 882   | 836  | 12,580,193 |

**Supplementary Table 13: Loci with most significant associations from imputed GWAS analysis.**

Shown are the most significant associations from the imputed GWAS analysis, with only one association shown per 250kb of genomic sequence. Closest Gene: the closest gene to the variant. rsID: the dbSNP ID of the variant (as predicted by the Variant Effect Predictor), if applicable. Chrom/Position: the chromosome and position of the variant. E.A./O.A.: the effect and non-effect alleles of the variant. Samples: the number of samples analyzed for the variant (i.e. the number of samples within subgroups in which the variant was polymorphic and passed quality control). MAF: the minor allele frequency of the variant, calculated across all samples. OR: the estimated odds-ratio of the variant. P: the *p*-value of the variant.

| Closest Gene   | rsID        | Chrom | Position  | E.A. | O.A. | Samples | MAF   | OR    | P        |
|----------------|-------------|-------|-----------|------|------|---------|-------|-------|----------|
| <i>TCF7L2</i>  | rs7903146   | 10    | 114758349 | T    | C    | 30683   | 0.25  | 1.34  | 1.48e-41 |
| <i>KCNQ1</i>   | rs2237896   | 11    | 2858440   | A    | G    | 27249   | 0.26  | 0.734 | 1.23e-32 |
| <i>CDC123</i>  | rs11257600  | 10    | 12255657  | T    | G    | 34529   | 0.31  | 1.16  | 6.14e-17 |
| <i>CDKAL1</i>  | rs9460550   | 6     | 20719561  | A    | G    | 34527   | 0.32  | 1.15  | 6.63e-15 |
| <i>SLC30A8</i> | rs3802177   | 8     | 118185025 | A    | G    | 27745   | 0.31  | 0.862 | 7.7e-14  |
| <i>IGF2BP2</i> | rs4414887   | 3     | 185506892 | T    | C    | 33555   | 0.32  | 1.13  | 3.72e-13 |
| <i>CTBP1</i>   | rs72501962  | 4     | 1246038   | A    | T    | 33797   | 0.28  | 1.15  | 7.56e-12 |
| <i>ASCL2</i>   | rs17737404  | 11    | 2270342   | A    | G    | 30237   | 0.23  | 1.22  | 3.7e-10  |
| <i>KCNJ11</i>  | rs10734252  | 11    | 17404839  | A    | G    | 34524   | 0.38  | 0.9   | 3.83e-10 |
| <i>HNF4A</i>   | rs6103716   | 20    | 42999630  | A    | C    | 34529   | 0.39  | 0.892 | 4.54e-10 |
| <i>KIF11</i>   | rs2153827   | 10    | 94424073  | T    | G    | 34442   | 0.34  | 1.11  | 9.97e-10 |
| <i>ZMIZ1</i>   | rs703978    | 10    | 80944147  | C    | G    | 34528   | 0.31  | 1.11  | 1.91e-09 |
| <i>IRS1</i>    | rs2943657   | 2     | 227123439 | T    | C    | 34529   | 0.26  | 1.12  | 2.82e-09 |
| <i>JAZF1</i>   | rs1635852   | 7     | 28189411  | T    | C    | 27745   | 0.34  | 1.12  | 3.67e-09 |
| <i>SFI1</i>    | rs2236033   | 22    | 32001050  | A    | G    | 34511   | 0.3   | 1.11  | 4.37e-09 |
| <i>GPSM1</i>   | rs376993806 | 9     | 139246588 | A    | G    | 29705   | 0.26  | 0.885 | 1.82e-08 |
| <i>SPRY2</i>   | rs1359790   | 13    | 80717156  | A    | G    | 34529   | 0.31  | 0.896 | 2.27e-08 |
| <i>EML4</i>    | -           | 2     | 42506923  | T    | TA   | 2657    | 0.44  | 1.43  | 3.02e-08 |
| <i>PPARG</i>   | rs4684848   | 3     | 12395645  | A    | G    | 34529   | 0.2   | 0.883 | 4.11e-08 |
| <i>WFS1</i>    | -           | 4     | 6301628   | T    | TTG  | 28470   | 0.21  | 1.14  | 4.45e-08 |
| <i>SOX11</i>   | rs896911    | 2     | 5376965   | T    | C    | 32372   | 0.38  | 0.908 | 5.84e-08 |
| <i>CCND2</i>   | rs76895963  | 12    | 4384844   | T    | G    | 4826    | 0.023 | 2.84  | 1.14e-07 |
| <i>AUTS2</i>   | -           | 7     | 69534694  | G    | GT   | 29821   | 0.23  | 0.878 | 1.17e-07 |
| <i>NTRK2</i>   | rs1573219   | 9     | 87387622  | A    | G    | 26568   | 0.3   | 0.903 | 2.1e-07  |
| <i>COBLL1</i>  | rs12692738  | 2     | 165558252 | T    | C    | 34529   | 0.23  | 1.12  | 2.25e-07 |



**Supplementary Table 14: Most significant nonsynonymous variants within T2D GWAS loci.** Shown are the 50 nonsynonymous variants within established T2D GWAS loci that achieved the lowest *p*-values in the exome sequence single-variant analysis. Columns are analogous to those in **Supplementary Table 4**. Locus: an identifier for the T2D GWAS locus containing the variant.

| Gene     | Locus        | Variant          | Consequence       | Change                 | MAF     | Case  | Ctrl  | OR    | P       |
|----------|--------------|------------------|-------------------|------------------------|---------|-------|-------|-------|---------|
| PAX4     | GCC1/PAX4    | rs2233580        | missense_variant  | p.Arg192His            | 0.12    | 890   | 563   | 1.7   | 7.6e-22 |
| SLC30A8  | SLC30A8      | rs13266634       | missense_variant  | p.Arg325Trp            | 0.43    | 12258 | 13756 | 0.897 | 3.4e-11 |
| WFS1     | WFS1         | rs1801212        | missense_variant  | p.Val333Ile            | 0.27    | 7101  | 8456  | 1.13  | 1.2e-10 |
| KCNJ11   | KCNJ11       | rs5215           | missense_variant  | p.Val250Ile            | 0.39    | 16687 | 16132 | 0.901 | 3.4e-10 |
| ABCC8    | KCNJ11       | rs757110         | missense_variant  | p.Ala1369Ser           | 0.39    | 16626 | 16237 | 0.913 | 7.1e-08 |
| MC4R     | MC4R         | rs79783591       | missense_variant  | p.Ile269Asn            | 0.0089  | 195   | 83    | 2.17  | 3.4e-07 |
| COBLL1   | COBLL1/GRB14 | rs7607980        | missense_variant  | p.Asn939Asp            | 0.15    | 4010  | 4651  | 0.857 | 6.3e-07 |
| PAM      | PAM          | rs35658696       | missense_variant  | p.Asp563Gly            | 0.05    | 1038  | 944   | 1.29  | 1.3e-06 |
| PPIP5K2  | PAM          | rs36046591       | missense_variant  | p.Ser1207Gly           | 0.049   | 986   | 905   | 1.3   | 1.4e-06 |
| GCKR     | GCKR         | rs1260326        | missense_variant  | p.Leu446Pro            | 0.5     | 15010 | 16627 | 1.07  | 5.4e-06 |
| TM6SF2   | CILP2        | rs58542926       | missense_variant  | p.Glu167Lys            | 0.1     | 2899  | 2694  | 1.14  | 2.6e-05 |
| FES      | PRC1         | var_15_91434859  | missense_variant  | p.Pro536Ser            | 0.0071  | 63    | 24    | 1.82  | 3.1e-05 |
| SENP2    | IGF2BP2      | rs6762208        | missense_variant  | p.Thr301Lys            | 0.49    | 18375 | 17667 | 1.07  | 3.8e-05 |
| PPARG    | PPARG        | rs1801282        | missense_variant  | p.Pro12Ala             | 0.12    | 4241  | 4935  | 0.894 | 6.5e-05 |
| HNF1A    | HNF1A        | var_12_121437091 | missense_variant  | p.Glu508Lys            | 0.006   | 93    | 33    | 2.25  | 9.1e-05 |
| TCF19    | HLA-B        | rs2073721        | missense_variant  | p.Met211Val            | 0.3     | 11485 | 11721 | 1.07  | 0.00013 |
| NUCB2    | KCNJ11       | rs757081         | missense_variant  | p.Gln338Glu            | 0.36    | 13223 | 13362 | 1.08  | 0.00017 |
| RREB1    | SSR1/RREB1   | rs9379084        | missense_variant  | p.Asp1171Asn           | 0.13    | 3641  | 4117  | 0.916 | 0.00026 |
| NUCB2    | KCNJ11       | rs3842269        | inframe_deletion  | p.401-402LeuGln/Leu    | 0.5     | 10255 | 11247 | 0.934 | 0.0003  |
| GPSM1    | GPSM1        | var_9_139235415  | missense_variant  | p.391-392SerGlu/LeuGlu | 0.28    | 8404  | 8458  | 0.931 | 0.00033 |
| C6orf136 | POU5F1/TCF19 | rs150233869      | missense_variant  | p.Arg220Cys            | 0.0086  | 69    | 92    | 0.527 | 0.00038 |
| GTF2H4   | POU5F1/TCF19 | rs140816086      | missense_variant  | p.Arg453His            | 0.001   | 16    | 34    | 0.476 | 0.00043 |
| SDCCAG3  | GPSM1        | rs1131992        | missense_variant  | p.Val356Met            | 0.26    | 7300  | 7616  | 0.928 | 0.00043 |
| THADA    | THADA        | rs35720761       | missense_variant  | p.Cys1605Tyr           | 0.15    | 4491  | 4736  | 0.927 | 0.00048 |
| WFS1     | WFS1         | rs734312         | missense_variant  | p.Arg611His            | 0.89    | 21467 | 21951 | 1.05  | 0.0005  |
| RBL2     | FTO          | rs199555150      | missense_variant  | p.Ser995Gly            | 0.01    | 51    | 97    | 0.619 | 0.0005  |
| HNF1A    | HNF1A        | rs1800574        | missense_variant  | p.Ala98Val             | 0.061   | 1059  | 915   | 1.17  | 0.00054 |
| VPS33B   | PRC1         | rs11073964       | missense_variant  | p.Gly514Ser            | 0.58    | 13333 | 15422 | 1.07  | 0.00071 |
| NOTCH1   | GPSM1        | rs61751489       | missense_variant  | p.Val2285Ile           | 0.16    | 2748  | 2756  | 0.882 | 0.00079 |
| SDCCAG3  | GPSM1        | rs3812577        | missense_variant  | p.Arg281Gln            | 0.26    | 7124  | 7422  | 0.929 | 0.00086 |
| C6orf15  | HLA-B        | rs2233977        | missense_variant  | p.Val81Ala             | 0.37    | 9445  | 9951  | 0.947 | 0.00086 |
| ACMSD    | TMEM163      | var_2_135621062  | missense_variant  | p.Thr116Met            | 0.0032  | 9     | 29    | 0.462 | 0.00089 |
| IFT172   | GCKR         | rs139229844      | missense_variant  | p.Gln866Arg            | 0.0017  | 27    | 5     | 3.    | 0.00089 |
| LST1     | HLA-B        | rs184203129      | missense_variant  | p.Ala46Thr             | 0.00067 | 16    | 4     | 2.96  | 0.00093 |
| TM6SF2   | CILP2        | rs187429064      | missense_variant  | p.Leu156Pro            | 0.019   | 415   | 363   | 1.3   | 0.00093 |
| SLC30A8  | SLC30A8      | rs73317647       | missense_variant  | p.Arg165Cys            | 0.0061  | 34    | 70    | 0.516 | 0.001   |
| MUC22    | POU5F1       | rs117024916      | missense_variant  | p.Thr71Ala             | 0.013   | 80    | 112   | 0.638 | 0.0012  |
| FAT3     | MTNR1B       | var_11_92620216  | missense_variant  | p.Lys665Glu            | 0.0013  | 9     | 31    | 0.51  | 0.0015  |
| GATAD2A  | CILP2        | rs370240766      | inframe_insertion | p.67Thr/ThrAlaMet      | 0.00066 | 4     | 15    | 0.464 | 0.0016  |
| RCCD1    | PRC1         | rs75390535       | missense_variant  | p.Leu249Val            | 0.099   | 583   | 701   | 0.828 | 0.0016  |
| MC4R     | MC4R         | var_18_58038669  | missense_variant  | p.Arg305Gln            | 0.00033 | 8     | 0     | 4.89  | 0.0017  |
| FSCN3    | GCC1/PAX4    | rs144391719      | missense_variant  | p.Arg356His            | 0.00023 | 11    | 1     | 3.85  | 0.0018  |
| FLT3     | PDX1         | rs62636526       | missense_variant  | p.Val16Leu             | 0.0089  | 94    | 52    | 1.7   | 0.0018  |
| MDGA1    | ZFAND3       | rs143644874      | missense_variant  | p.Glu756Gln            | 0.0069  | 54    | 72    | 0.492 | 0.0018  |
| WFS1     | WFS1         | rs1801208        | missense_variant  | p.Arg456His            | 0.091   | 3063  | 2828  | 1.1   | 0.0019  |
| C6orf15  | HLA-B        | rs2233978        | missense_variant  | p.Ala145Pro            | 0.37    | 7733  | 7907  | 0.938 | 0.0019  |
| SLC30A8  | SLC30A8      | rs145677283      | missense_variant  | p.Arg165His            | 0.0014  | 15    | 34    | 0.447 | 0.0021  |
| LAMA1    | LAMA1        | rs115759032      | missense_variant  | p.Leu1932Val           | 0.006   | 33    | 60    | 0.564 | 0.0021  |
| CARD9    | GPSM1        | rs4077515        | missense_variant  | p.Ser12Asn             | 0.54    | 19891 | 20405 | 0.956 | 0.0022  |
| F2RL1    | ZBED3        | rs148584357      | missense_variant  | p.His135Arg            | 0.00026 | 8     | 0     | 5.74  | 0.0022  |

**Supplementary Table 15: Most significant protein-truncating variants within T2D GWAS loci.** Shown are all protein-truncating variants (as annotated by the Variant Effect Predictor) within established T2D GWAS loci that achieved  $p < 0.05$  in the exome sequence single-variant analysis. Columns are analogous to those in **Supplementary Table 14.**

| Gene       | Locus         | Variant          | Consequence             | Change                          | MAF     | Case  | Ctrl  | OR     | P      |
|------------|---------------|------------------|-------------------------|---------------------------------|---------|-------|-------|--------|--------|
| STOX1      | VPS26A        | var_10_70644927  | stop_gained             | p.Gln459Ter                     | 0.00066 | 8     | 0     | 4.85   | 0.0034 |
| CRIPAK     | MAEA          | var_4_1388335    | stop_gained             | p.Cys12Ter                      | 0.0045  | 65    | 101   | 0.657  | 0.004  |
| PPM1N      | GIPR          | var_19_46005322  | frameshift_variant      | p.-106-107Ter                   | 0.001   | 7     | 23    | 0.323  | 0.0046 |
| CDSN       | HLA-B         | var_6_31084723   | frameshift_variant      | p.218-223CysSerSerAspIlePro/Ter | 0.016   | 91    | 142   | 0.707  | 0.0064 |
| THADA      | THADA         | var_2_43817961   | splice_acceptor_variant | -                               | 0.0004  | 14    | 9     | 0.238  | 0.0073 |
| THADA      | THADA         | var_2_43817962   | splice_acceptor_variant | -                               | 0.0004  | 12    | 9     | 0.239  | 0.0075 |
| IFT172     | GCKR          | rs150246251      | stop_gained             | p.Arg1507Ter                    | 0.00024 | 4     | 0     | 5.34   | 0.011  |
| ABCB9      | MPHOSPH9      | var_12_123419979 | splice_acceptor_variant | -                               | 0.00019 | 4     | 0     | 8.12   | 0.013  |
| DPY19L4    | TP53INP1      | rs200830188      | splice_acceptor_variant | -                               | 0.0011  | 10    | 2     | 3.71   | 0.014  |
| SNAPC4     | GPSM1         | var_9_139278009  | frameshift_variant      | p.Ser537Ter                     | 0.00042 | 5     | 4     | 5.19   | 0.017  |
| C11orf21   | IGF2          | rs3214127        | frameshift_variant      | p.-119-120Ter                   | 0.034   | 166   | 130   | 1.29   | 0.017  |
| SPATA31D5P | TLE1          | var_9_84528573   | splice_acceptor_variant | -                               | 0.00034 | 0     | 8     | 0.0938 | 0.017  |
| RBM28      | LEP           | var_7_127961426  | stop_gained             | p.Arg486Ter                     | 0.00025 | 0     | 3     | 0.118  | 0.018  |
| KRTCAP3    | GCKR          | rs140428163      | frameshift_variant      | p.119Leu/LeuTer                 | 0.001   | 10    | 20    | 0.437  | 0.019  |
| C15orf53   | RASGRP1       | var_15_38988925  | frameshift_variant      | p.39-40AlaSer/AlaTer            | 0.006   | 63    | 54    | 1.32   | 0.02   |
| SNX17      | GCKR          | var_2_27599220   | frameshift_variant      | p.408-410AspSerGln/Ter          | 0.002   | 46    | 24    | 1.64   | 0.021  |
| VPS13C     | C2CD4A/C2CD4B | var_15_62169177  | stop_gained             | p.Glu3364Ter                    | 0.00016 | 6     | 0     | 5.3    | 0.023  |
| KCNQ1      | KCNQ1         | rs11601907       | stop_gained             | p.Tyr662Ter                     | 0.27    | 4247  | 4392  | 1.08   | 0.025  |
| VPS33B     | PRC1          | var_15_91553029  | splice_acceptor_variant | -                               | 0.00041 | 5     | 0     | 5.58   | 0.026  |
| TIMP4      | PPARG         | var_3_12195162   | stop_gained             | p.Cys176Ter                     | 0.00065 | 7     | 1     | 3.55   | 0.026  |
| SLC16A13   | SLC16A11      | rs202121781      | stop_gained             | p.Arg282Ter                     | 0.00017 | 5     | 0     | 2.65   | 0.028  |
| PEX11A     | AP3S2         | var_15_90229661  | splice_acceptor_variant | -                               | 0.00012 | 4     | 0     | 4.3    | 0.028  |
| BLM        | PRC1          | rs367543013      | frameshift_variant      | p.256-257AspSer/AspTer          | 0.00018 | 0     | 5     | 0.261  | 0.029  |
| TIGD4      | TMEM154       | var_4_153691112  | frameshift_variant      | p.Phe348Ter                     | 0.00072 | 5     | 10    | 0.432  | 0.035  |
| DHTKD1     | CDC123/CAMK1D | var_10_12159670  | splice_acceptor_variant | -                               | 0.0002  | 1     | 5     | 0.209  | 0.035  |
| RHBDL2     | MACF1         | var_1_39381293   | stop_gained             | p.Tyr112Ter                     | 0.0014  | 29    | 13    | 1.85   | 0.036  |
| ATG16L2    | ARAP1         | var_11_72535166  | splice_acceptor_variant | -                               | 0.00013 | 4     | 0     | 8.64   | 0.036  |
| COBLL1     | COBLL1/GRB14  | var_2_165551295  | frameshift_variant      | p.907Leu/PheTer                 | 0.019   | 81    | 70    | 0.331  | 0.037  |
| KIF6       | KCNK16        | rs202222855      | stop_gained             | p.Ser244Ter                     | 0.00025 | 3     | 0     | 3.62   | 0.038  |
| IGF2BP2    | IGF2BP2       | var_3_185375092  | frameshift_variant      | p.Phe456Ter                     | 0.00033 | 7     | 1     | 4.09   | 0.039  |
| SNAPC4     | GPSM1         | rs3812565        | frameshift_variant      | p.1259L/LPQPGPEKALDLEX          | 0.46    | 15090 | 13994 | 0.958  | 0.039  |
| ZNF14      | CILP2         | var_19_19822199  | stop_gained             | p.630-631PheArg/PheTer          | 0.00025 | 0     | 2     | 0.229  | 0.04   |
| KRTAP5-5   | DUSP8         | var_11_1651596   | frameshift_variant      | p.176-194SSCCKPYCCQSSCCKPYCC/X  | 0.16    | 4304  | 4202  | 0.934  | 0.041  |
| HMGCS2     | NOTCH2        | rs1048438        | stop_gained             | p.297Tyr/TerTyr                 | 0.00025 | 0     | 3     | 0.215  | 0.043  |
| FAM135A    | C6orf57       | var_6_71195923   | stop_gained             | p.Arg250Ter                     | 0.00035 | 9     | 2     | 3.63   | 0.043  |
| ZNF14      | CILP2         | var_19_19822283  | stop_gained             | p.Arg603Ter                     | 0.00012 | 0     | 3     | 0.251  | 0.043  |
| OTOG       | KCNJ11        | var_11_17631829  | frameshift_variant      | p.Ser679Ter                     | 0.00042 | 0     | 7     | 0.155  | 0.044  |
| NANOS2     | GIPR          | var_19_46417550  | frameshift_variant      | p.134Arg/ArgTer                 | 0.0003  | 1     | 5     | 0.428  | 0.045  |
| SPDYE1     | GCK           | var_7_44042207   | frameshift_variant      | p.93Ser/SerTer                  | 9.8e-05 | 0     | 5     | 0.304  | 0.046  |
| PMPCA      | GPSM1         | var_9_139311505  | stop_gained             | p.Tyr246Ter                     | 0.00013 | 3     | 0     | 0.986  | 0.046  |
| P2RX7      | HNF1A         | var_12_121603952 | stop_gained             | p.Arg236Ter                     | 0.00016 | 1     | 6     | 0.353  | 0.047  |
| PLIN1      | AP3S2         | var_15_90213359  | stop_gained             | p.Cys150Ter                     | 0.00013 | 0     | 4     | 0.183  | 0.047  |
| FGF6       | CCND2         | rs375467953      | initiator_codon_variant | p.Met1Leu                       | 0.00017 | 4     | 2     | 2.33   | 0.047  |
| DDX52      | HNF1B         | var_17_35985993  | stop_gained             | p.Gln362Ter                     | 0.00013 | 1     | 4     | 0.181  | 0.047  |
| PRR3       | POU5F1/TCF19  | rs371871050      | stop_gained             | p.Arg171Ter                     | 0.00082 | 8     | 2     | 2.51   | 0.048  |
| CRIPAK     | MAEA          | rs373049641      | stop_gained             | p.Arg39Ter                      | 0.006   | 111   | 98    | 0.805  | 0.048  |
| VPS4B      | BCL2          | var_18_61067295  | frameshift_variant      | p.259Leu/ProTer                 | 0.0002  | 6     | 0     | 6.53   | 0.048  |
| KIF6       | KCNK16        | var_6_39330288   | frameshift_variant      | p.74Ser/CysTer                  | 0.00033 | 2     | 4     | 0.261  | 0.049  |
| RFC4       | ST6GAL1       | rs370046824      | splice_acceptor_variant | -                               | 0.00066 | 2     | 6     | 0.21   | 0.049  |
| DHX16      | POU5F1/TCF19  | rs368358552      | stop_gained             | p.Gln370Ter                     | 0.00012 | 2     | 0     | 4.61   | 0.049  |



## Supplementary Figures

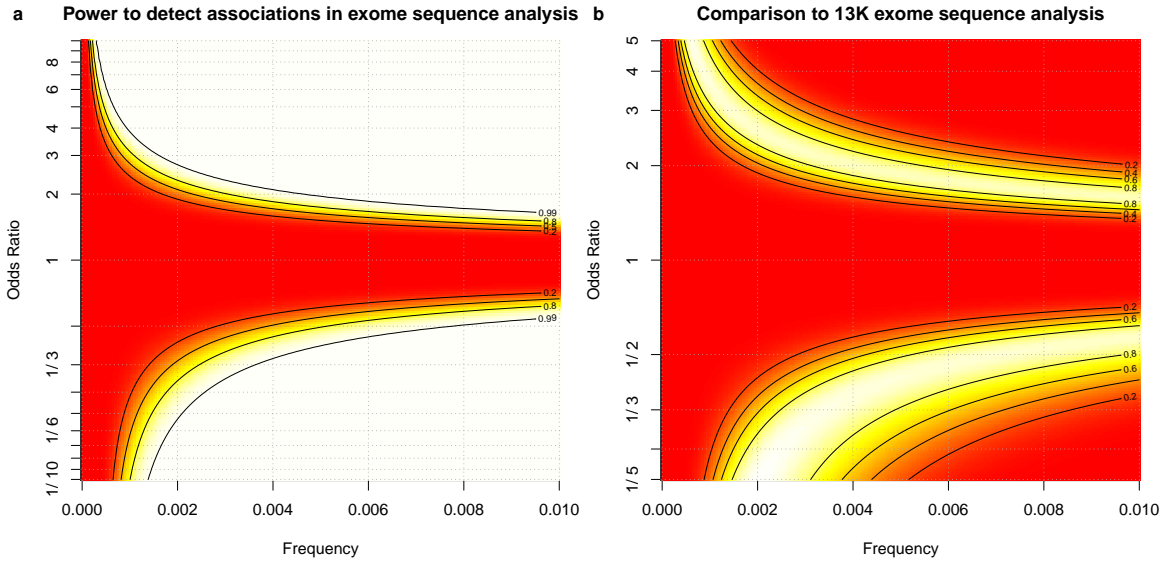

**Supplementary Figure 1: Power analysis.** Shown is the power to detect association below  $p < 5 \times 10^{-8}$  for variants (or collections of variants) with a given minor allele frequency (x-axis) and odds ratio (y-axis) measured as the average across all ancestries. **(a)** Cells are shaded according to the power of the current study of 20,791 T2D cases and 24,440 controls, with white indicating high power and red indicating low power. **(b)** Cells are shaded according to the difference in power between the current study and a previously published study of 12,940 individuals [4], with yellow/white indicating a large increase in power and red indicating a small increase in power. For each plot, 20%, 50%, 80%, and 99% contour lines are labeled.

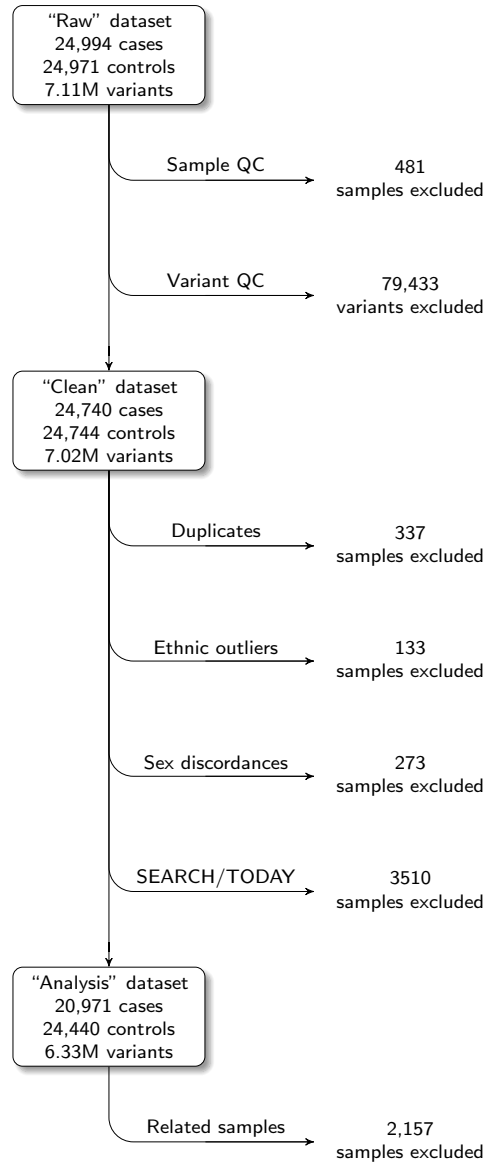

**Supplementary Figure 2: Data quality control workflow.** Shown is a schematic of the steps involved in sample and variant quality control, conducted as described in **Methods** to construct a final set of samples and variants included in association analysis. Each step is depicted as an arrow, with the number of samples or variants excluded by the step shown at the end of the arrow. The final set of samples and variants analyzed are represented by the “Analysis” dataset; we further excluded samples of high relatedness to other samples in the dataset from some but not all analyses. After each step that removed samples, we also removed newly monomorphic variants (hence the decrease in variants between the “Clean” and “Analysis” datasets).

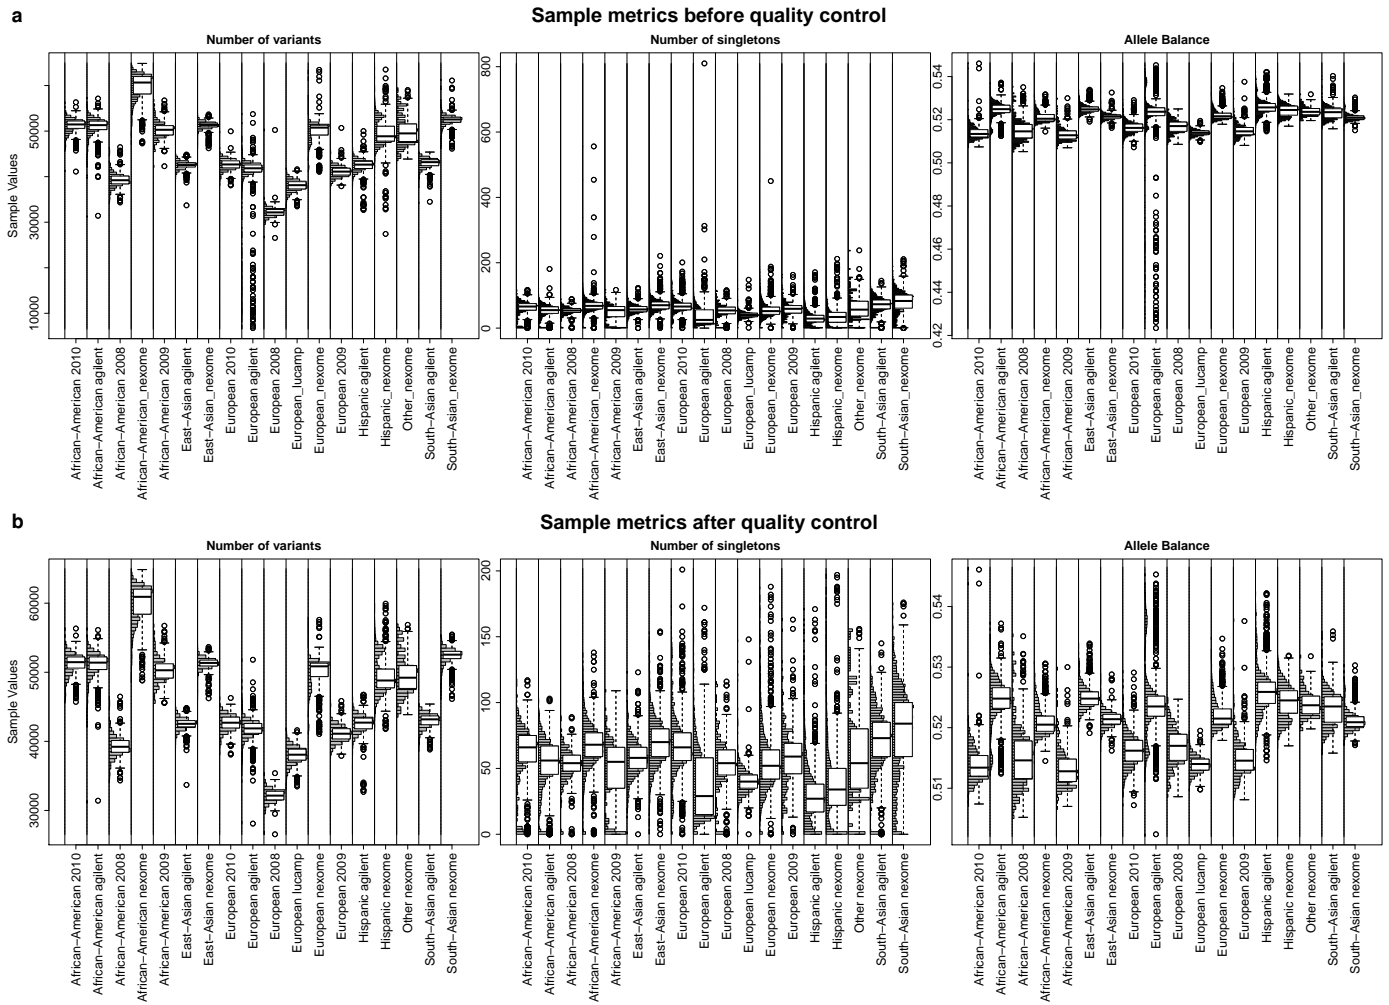

**Supplementary Figure 3: Sample quality control metrics.** To perform sample quality control, we computed a series of metrics that informed on the sequencing quality of a sample. We then stratified samples by ancestry and sequencing technology (i.e. capture technology and year of sequencing), plotted the distribution of metrics for each stratum of samples, and used these plots to visually identify outlier samples for removal by quality control. Shown are (left to right) distributions of the number of variant alleles carried by each sample, the number of variant alleles unique to a sample carried by each sample, and the average fraction of sequence reads supporting a non-reference allele at heterozygous sites within each sample. Distributions are shown for **(a)** all samples from the "Raw" dataset and **(b)** all samples from the "Clean" dataset. Sample strata are labeled by a combination of ancestry and (internal names for) sequencing technology.

### Concordance of exome and SNP array genotypes

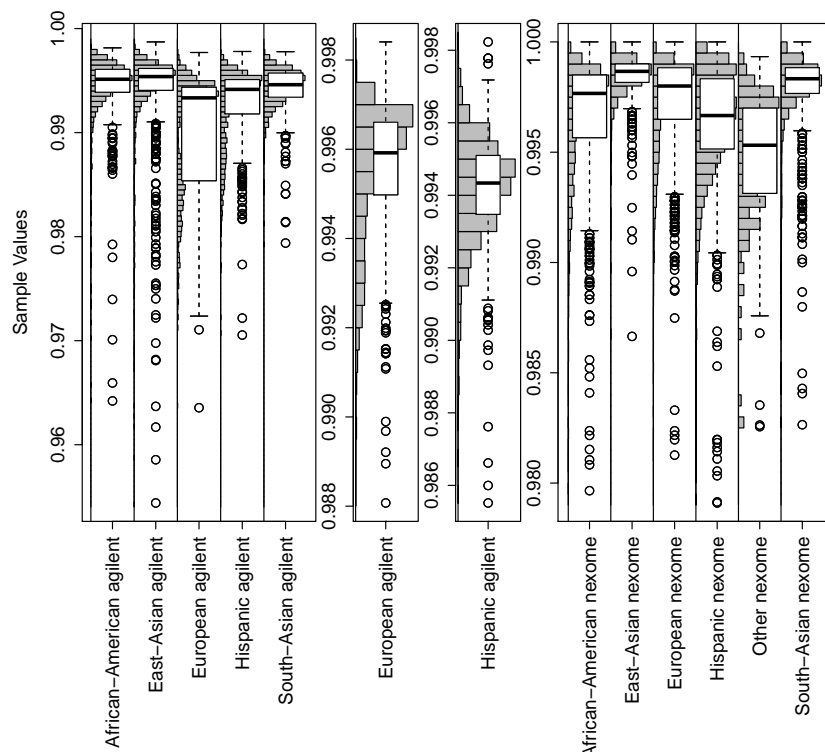

**Supplementary Figure 4: Concordance of exome sequence and SNP array genotypes.** We measured concordance between genotypes called non-reference from sequence data and genotypes called at the same sites in the same samples from SNP array data. Samples are stratified via the same manner as in **Supplementary Figure 3**; the y-axis plots the fraction of non-reference genotypes with an identical genotype call in the corresponding SNP array data. We used four different groups of SNP array data in the analysis (**Methods**), resulting in different y-axis scales for different SNP arrays. Hispanic refers to individuals of either Hispanic or Latino ancestry.

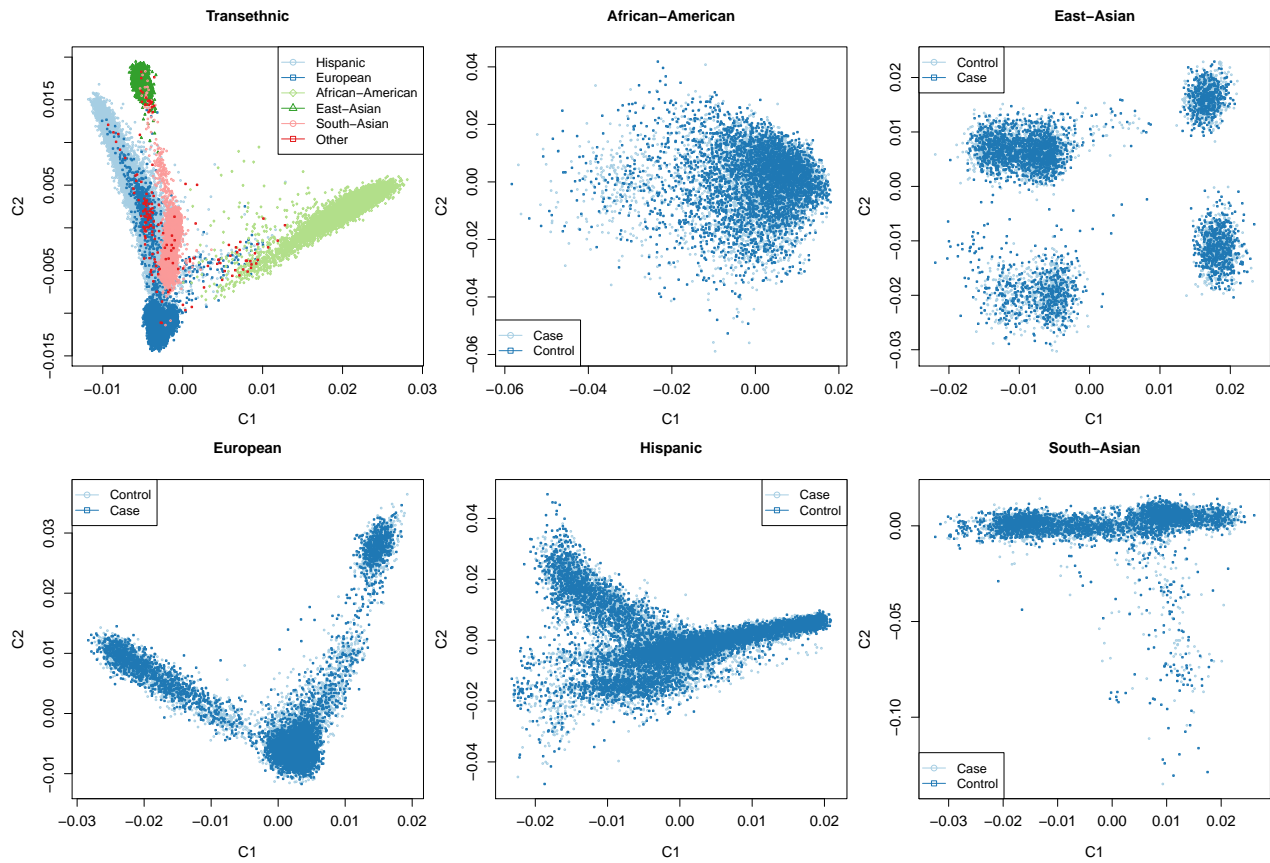

**Supplementary Figure 5: Principal component analysis.** We computed principal component analysis (PCA) based on an LD-pruned collection of variants from exome sequence data. We computed a PCA across all samples (Transethnic; samples colored by reported ancestry) using SNPs common (MAF>1%) in each ancestry, as well as additional PCAs specific to samples from each ancestry (Ancestry labeled plots; samples colored by case/control status for T2D) using a broader set of SNPs common (MAF>1%) in the relevant ancestry.



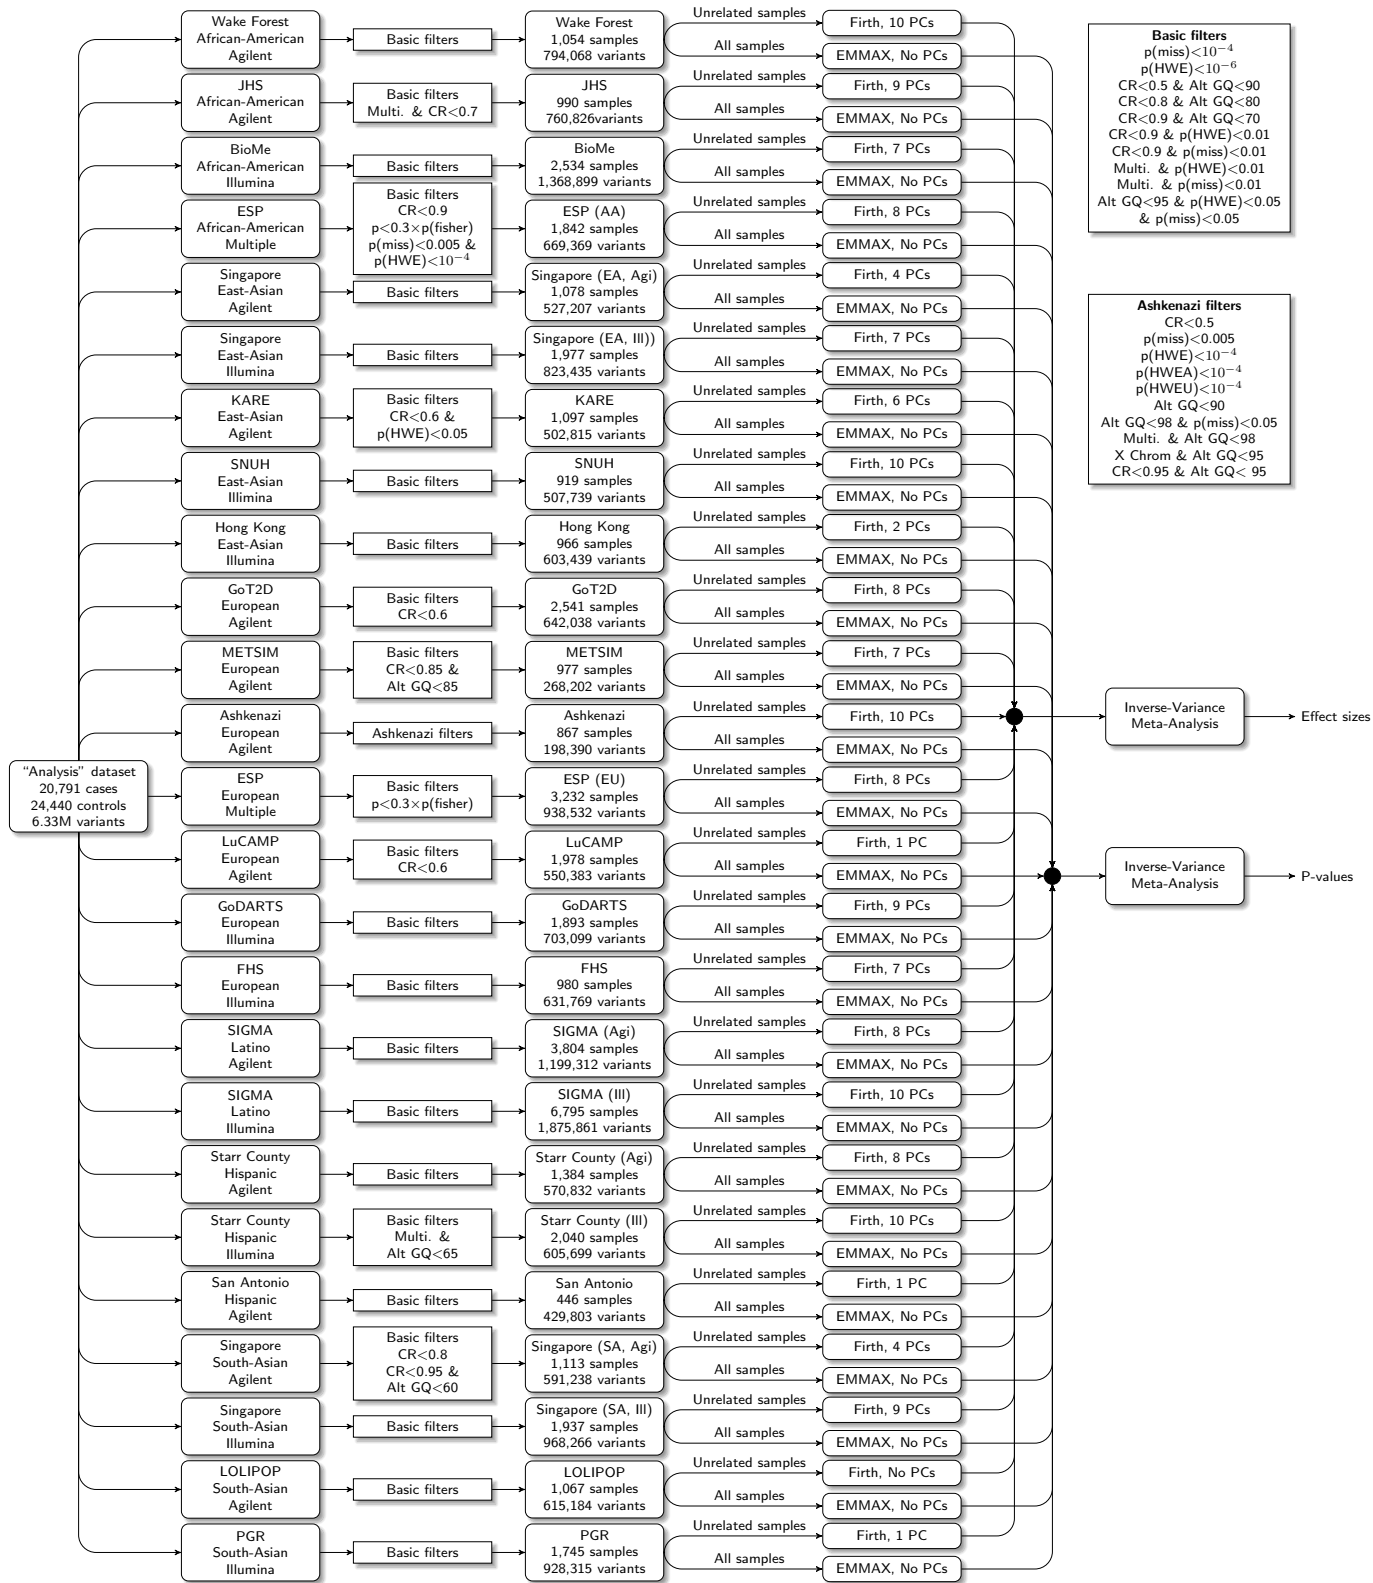

---

**Supplementary Figure 6 (preceding page): Single-variant association analysis workflow.** Shown is a schematic of the steps involved in single-variant exome sequence association analysis, as described in **Methods**. We began analysis with a division of samples in the “Analysis” dataset (leftmost column) into 25 different subgroups (second column from left) based on cohort, ancestry and sequencing technology (labeled in each box in the second column). We then filtered variants according to metrics computed separately for each subgroup; we applied the filters listed in the “Basic filters” box to all subgroups, and for some subgroups we applied additional (more stringent) filters as indicated by boxes in the third column from left. The resulting number of variants and samples advanced for analysis in each subgroup are indicated in the fourth column from left. We analyzed each subgroup with both the EMMAX test (to measure association strength) and the Firth test (to measure allelic odds ratios); the number of principal components included as covariates in the Firth test is shown in the fifth column from the left. Finally, we combined each of the EMMAX and Firth results via a 25-group meta-analysis to produce the final  $p$ -values and odds ratios reported for each variant. Multi: variant is multiallelic; CR: call rate; p: variant subgroup-level  $p$ -value; p(fisher): variant subgroup-level  $p$ -value from fisher exact test; p(miss):  $p$ -value for subgroup-level variant differential missingness between T2D cases and controls; p(HWE):  $p$ -value for deviation from subgroup-level hardy-weinberg equilibrium; Alt GQ: mean genotype quality of non-reference genotypes (across all samples); X Chrom: variant is on X chromosome.

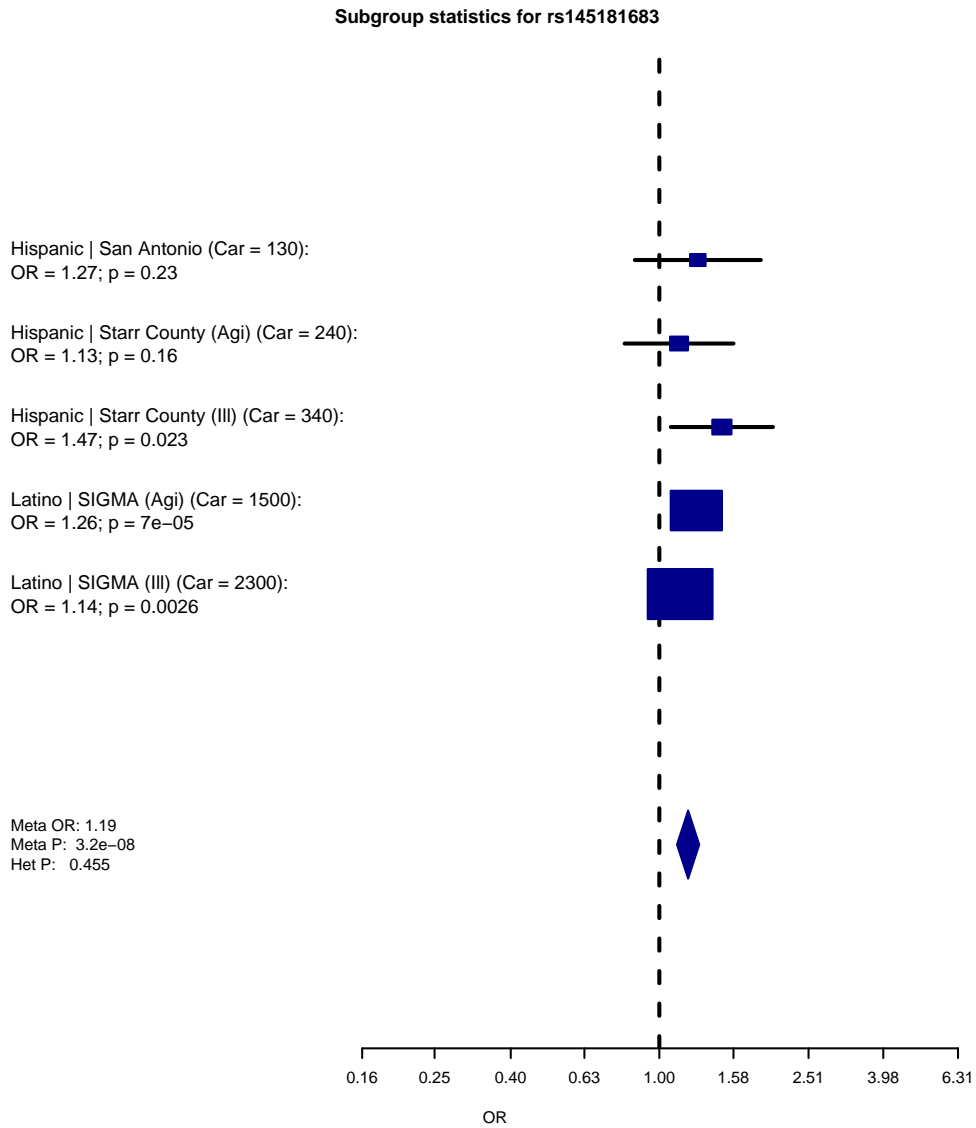

**Supplementary Figure 7: *SF11* subgroup-level associations.** Shown are the  $p$ -values and odds-ratio estimates for each sample subgroup with at least 10 carriers of the rs145181683 variant in *SF11*. Blue boxes indicate odds ratios (sized proportionately to the number of carriers in the subgroup) and black bars indicate standard errors. Car: number of variant carriers. Meta: results from the full analysis across all 25 sample subgroups (including those not shown in this figure). Het P:  $p$ -value of test for heterogeneity in odds ratios across sample subgroups.

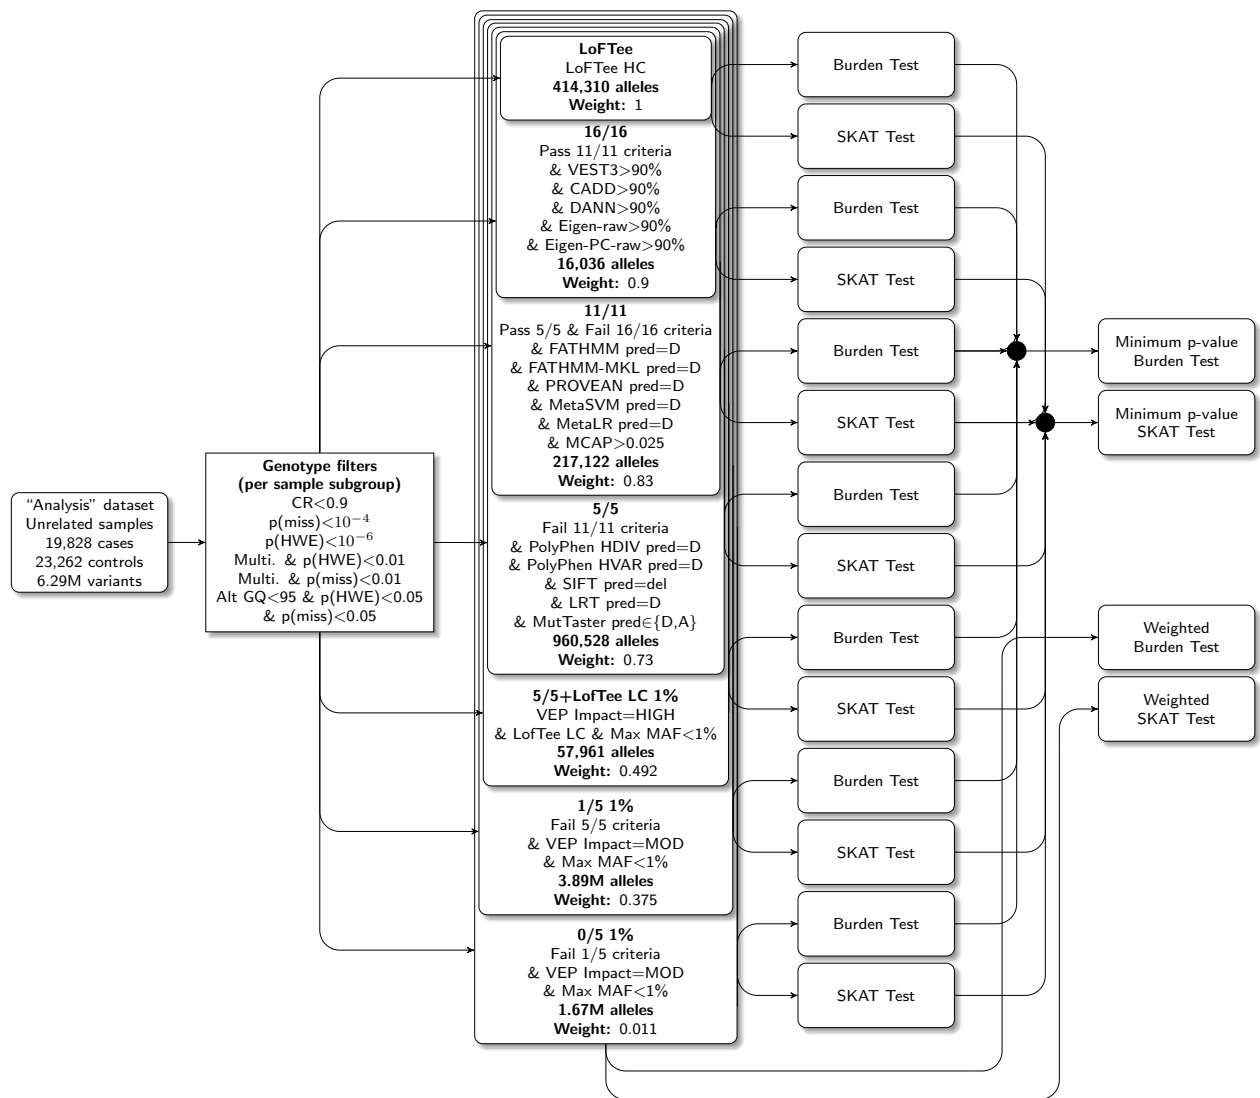

**Supplementary Figure 8: Gene-level association analysis workflow.** Shown is a schematic of the steps involved in gene-level exome sequence association analysis, as described in **Methods**. We began analysis with subgroup-level genotype filtering (second column from left) of unrelated samples in the “Analysis” dataset (leftmost column); we then applied genotype filters for each subgroup (filtering genotypes for either all or no samples in each subgroup) that were similar to those used in subgroup-level single-variant analysis. We then annotated each non-reference variant allele with 16 different bioinformatic algorithms to assess allele deleteriousness, and we grouped alleles into one of seven nested masks (third column from left; the number of variants and weights shown correspond to alleles absent from “higher”, or more stringent, nested masks). We computed burden and SKAT analyses via one of two approaches to combine alleles across masks (**Methods**): first, by analyzing all alleles at once with weights assigned according to the most stringent mask containing the allele (weighted test); and second, by analyzing each mask independently and then calculating the lowest  $p$ -value corrected for the effective number of tests (minimum  $p$ -value test).

### Validation of PPARG variant annotations

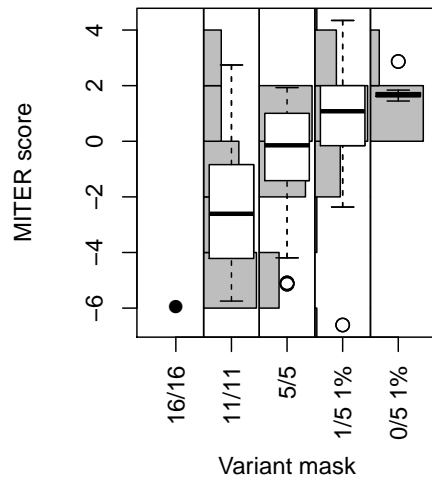

**Supplementary Figure 9: Validation of allele deleteriousness within variant masks.** To assess whether the severity ordering of masks in **Supplementary Figure 8** corresponded to an increasing likelihood that an allele in the mask was deleterious, we used previously published data assessing the extent to which missense variants in the gene *PPARG* impede adipocyte differentiation. For the five masks containing at least one *PPARG* allele, shown are box plots or strip charts of allelic MITER scores (a measure of predicted *PPARG* loss of function, with lower scores suggesting lower function).

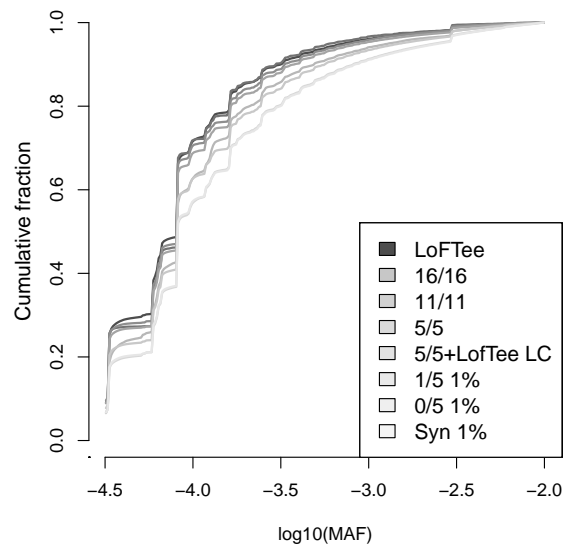

**Supplementary Figure 10: Annotation mask weight estimation.** For each variant mask, we estimated allelic weights corresponding to the fraction of loss-of-function alleles in the mask, under a previously presented [3] model whereby a set of missense alleles is a mixture of fully loss-of-function or fully benign alleles. Weights corresponded to the fraction of loss-of-function alleles in each mask, estimated to maximize the likelihood of the allele frequency distribution, with the LofTee mask used as a reference for loss-of-function alleles and the set of synonymous alleles with frequency below 1% used as a reference for benign alleles. Shown are the cumulative frequency distributions for alleles “unique” to each mask (i.e. absent from all more stringent masks).

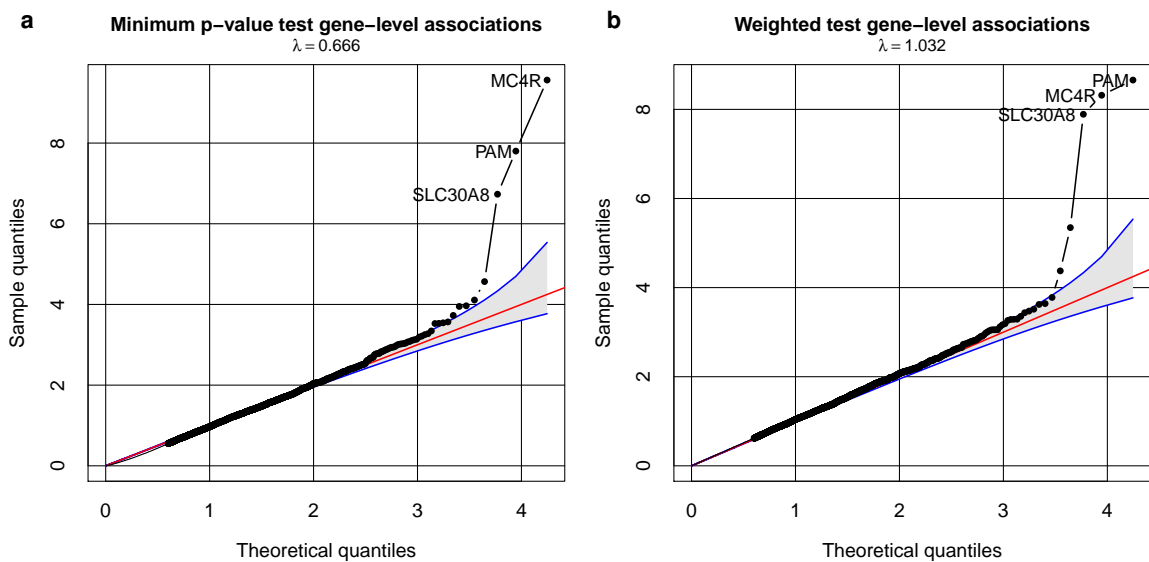

**Supplementary Figure 11: Calibration of gene-level association analyses.** For both the burden and SKAT tests, we tested for gene-level association within seven different allelic masks. As this produced seven  $p$ -values for each test, we developed two means to consolidate these results (**Methods**). Shown are quantile-quantile (QQ) plots of associations for the **(a)** minimum  $p$ -value burden test and **(b)** weighted burden test. Only genes with combined minor allele count of 20 or greater are shown in the QQ plots, in order to avoid deflation from genes with too few variants to produce  $p$ -values asymptotically uniform under the null. Lambda values indicate genomic control, as measured by the ratio in observed median  $\chi^2$  statistic to that expected under the null. The three genes with exome-wide significant associations are labeled.

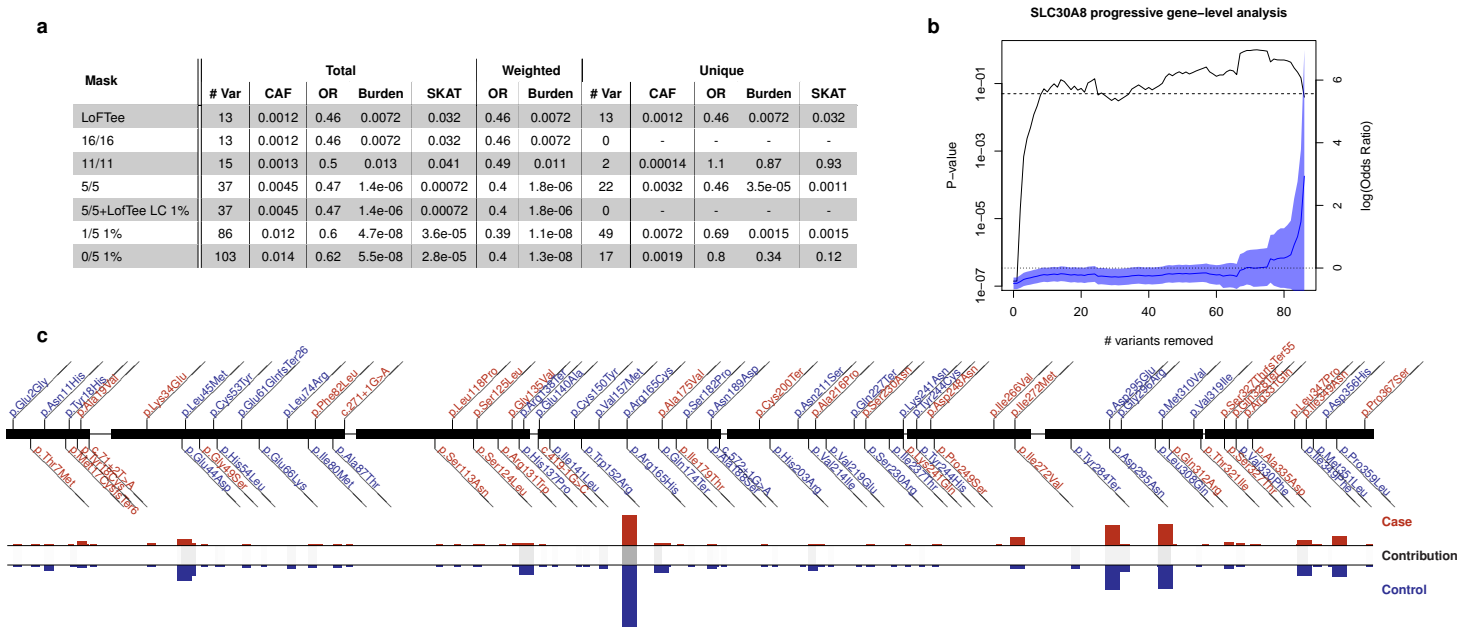

**Supplementary Figure 12: *SLC30A8* gene-level analysis.** Shown is a dissection of the gene-level associations for *SLC30A8*. **(a)** Mask-level statistics for the burden and SKAT tests, as well as the weighted burden test. Each row in the table corresponds to one of the allele masks defined in **Supplementary Figure 8**. The first five columns (“Total”) show association results for an analysis of all alleles in the mask; the final five columns (“Unique”) show association results for analysis of alleles unique to the mask (i.e. are not present in more deleterious masks). The “Weighted” columns show association results for a weighted burden test of all alleles in each mask; the weighted burden result used in the main analysis is that in the final row. #Var: the number of variants in the association analysis. CAF: the total combined frequency of all alleles in the analysis. OR: the odds-ratio estimated from the burden (or weighted burden) analysis. Burden: the  $p$ -value from the burden test. SKAT: the  $p$ -value from the SKAT analysis. The #Var and CAF columns for the “Total” analysis also apply to the “Weighted” analysis. **(b)** Gene-level association  $p$ -values for *SLC30A8*, using the burden test on alleles in the 1/5 1% mask (that achieving greatest statistical significance) after progressive removal of variants ordered by increasing single-variant  $p$ -value. The left-axis (black line) shows the observed  $-\log_{10}(p)$  value, with dashed line indicating nominal significance of  $p < 0.05$ . The right-axis (blue line) shows the estimated effect size ( $\log(OR)$ ), with shaded blue indicating the 95% confidence interval and dotted line indicating effect size=0. This figure is repeated from **Figure 1c** in the main text. **(c)** A graphical plot of variants observed in *SLC30A8* within the 1/5 1% mask. Variants are colored blue (if individual OR < 1) or red (OR > 1). Case (red) and control (blue) frequencies are shown below for each variant, with black boxes shaded according to the contribution of each variant to the gene-level signal (computed by the difference in  $\log_{10}(p)$  observed after removal of the variant from the test). This figure is repeated from **Figure 1d** in the main text. OR: odds ratio.



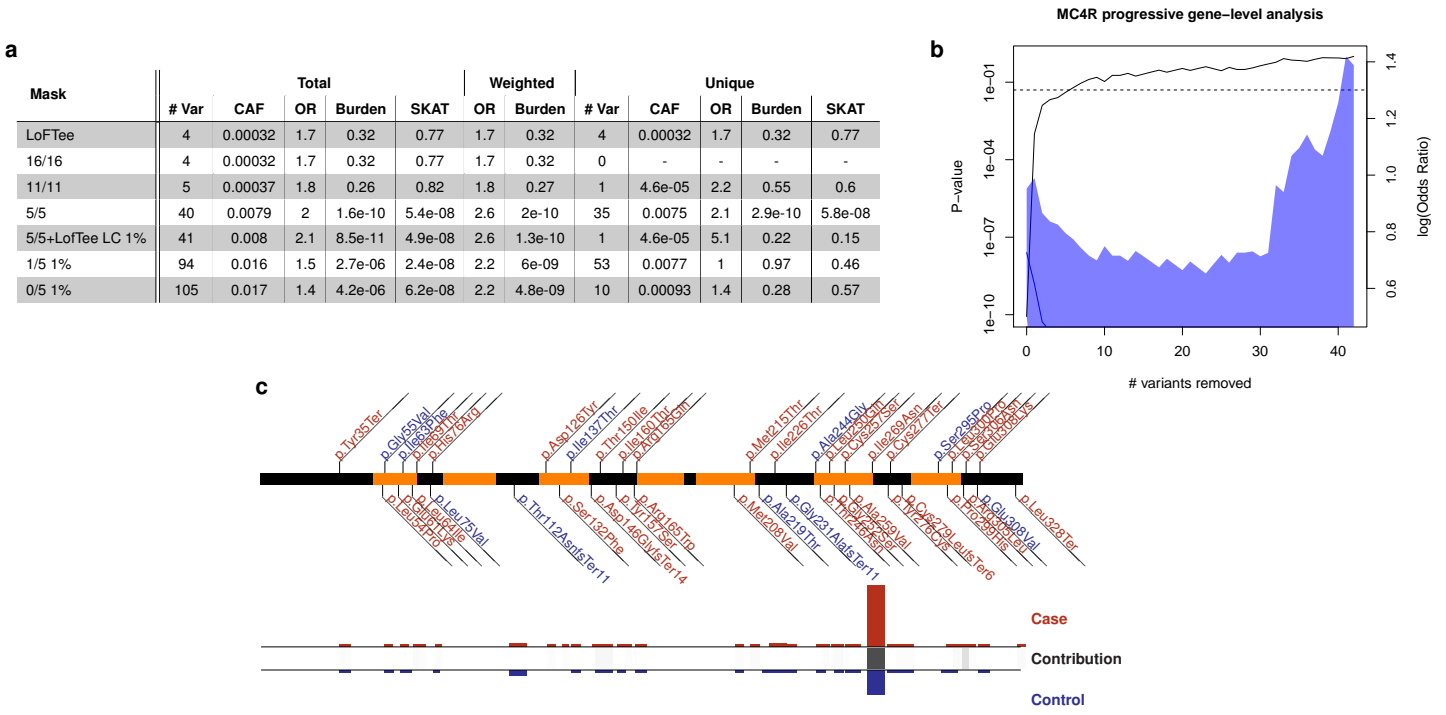

**Supplementary Figure 13: *MC4R* gene-level analysis.** Shown is a dissection of the gene-level associations for *MC4R*. Panels are analogous to those in **Supplementary Figure 12**.

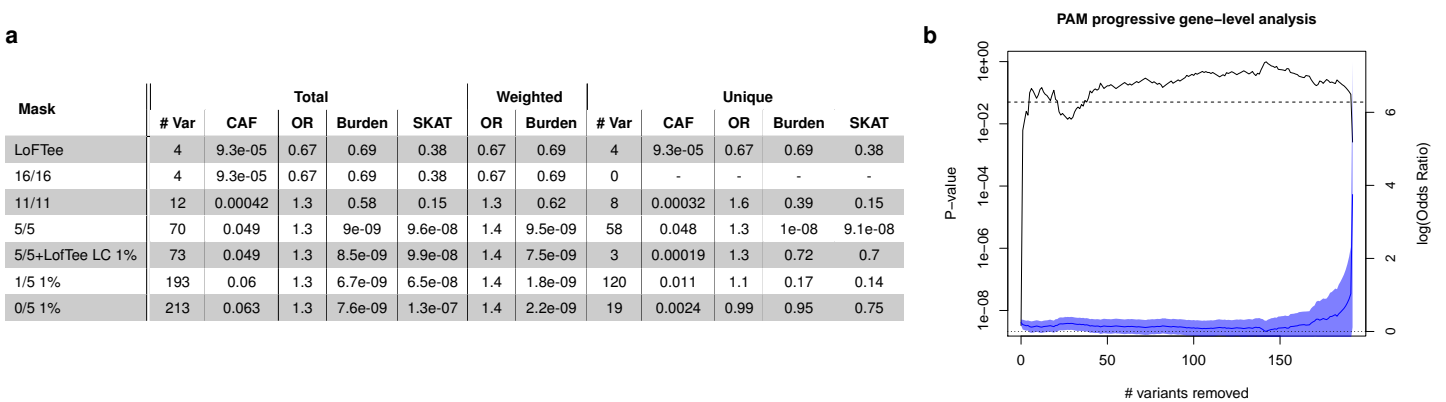

**Supplementary Figure 14: *PAM* gene-level analysis.** Shown is a dissection of the gene-level associations for *PAM*. Panels are analogous to those in **Supplementary Figures 12** and **13**. A graphical plot of variants is not shown due to the large number of variants in *PAM*.

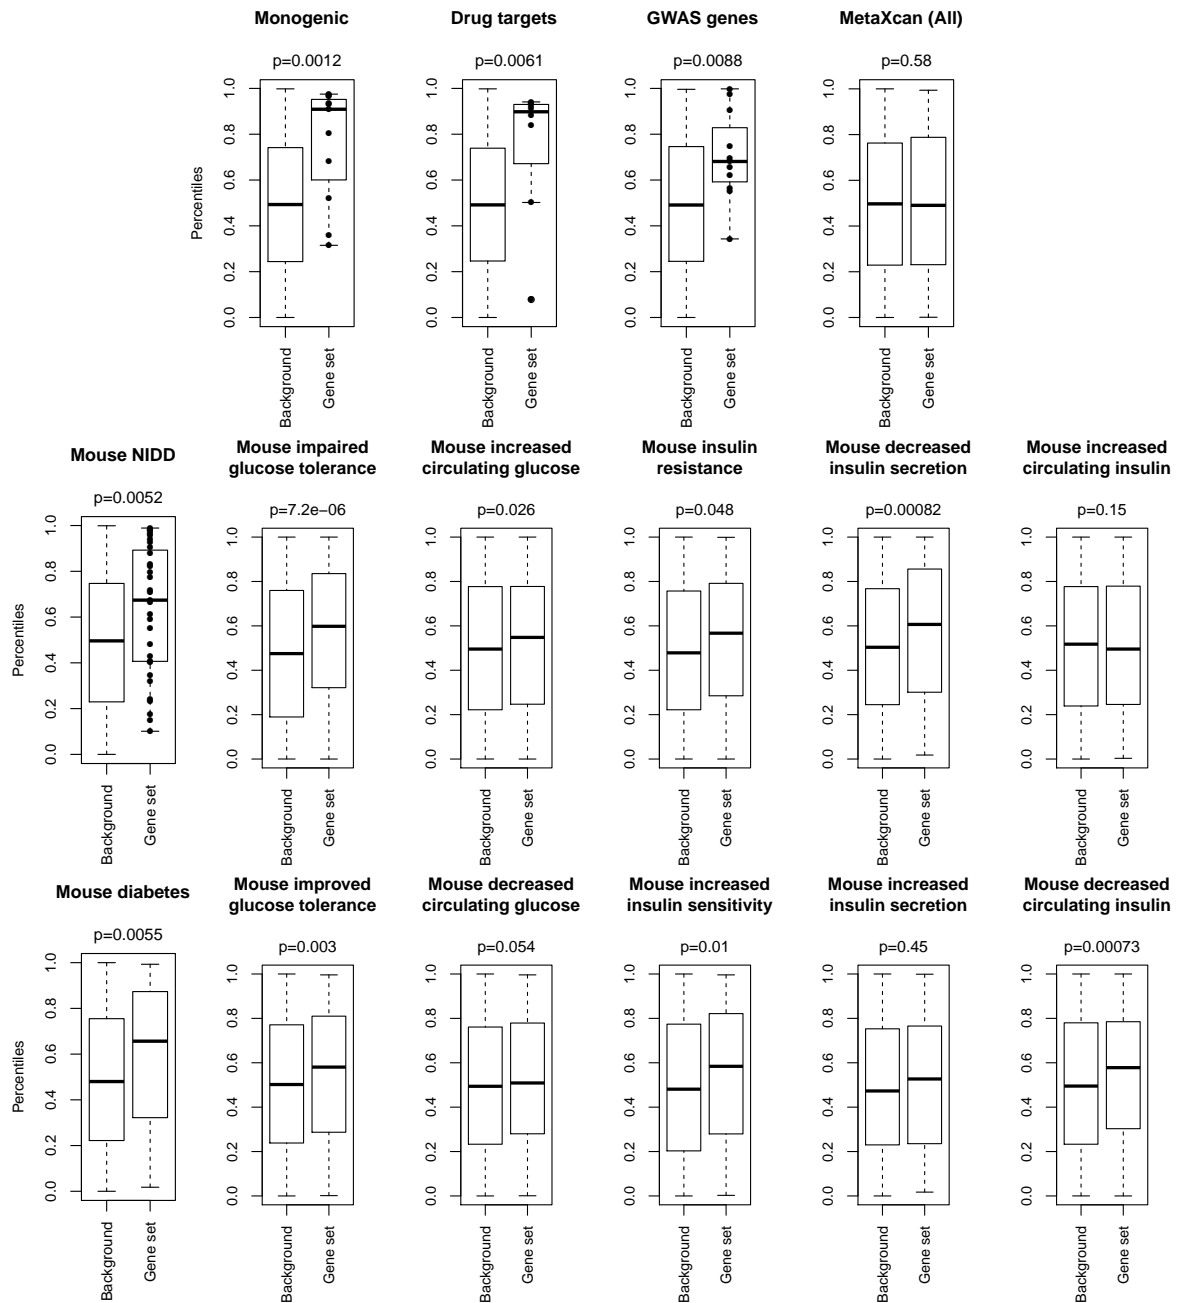

**Supplementary Figure 15: Full results from exome sequence gene set analysis.** For various sets of genes implicated as relevant to T2D based on knockout mouse phenotypes, we used a one-side Wilcoxon rank-sum test to compare gene-level association statistics to those of matched comparison genes (**Methods**). Shown are box plots of the distributions of rank percentiles (1 being the highest) for each gene set analyzed. Plots are analogous to those in **Figure 2**.

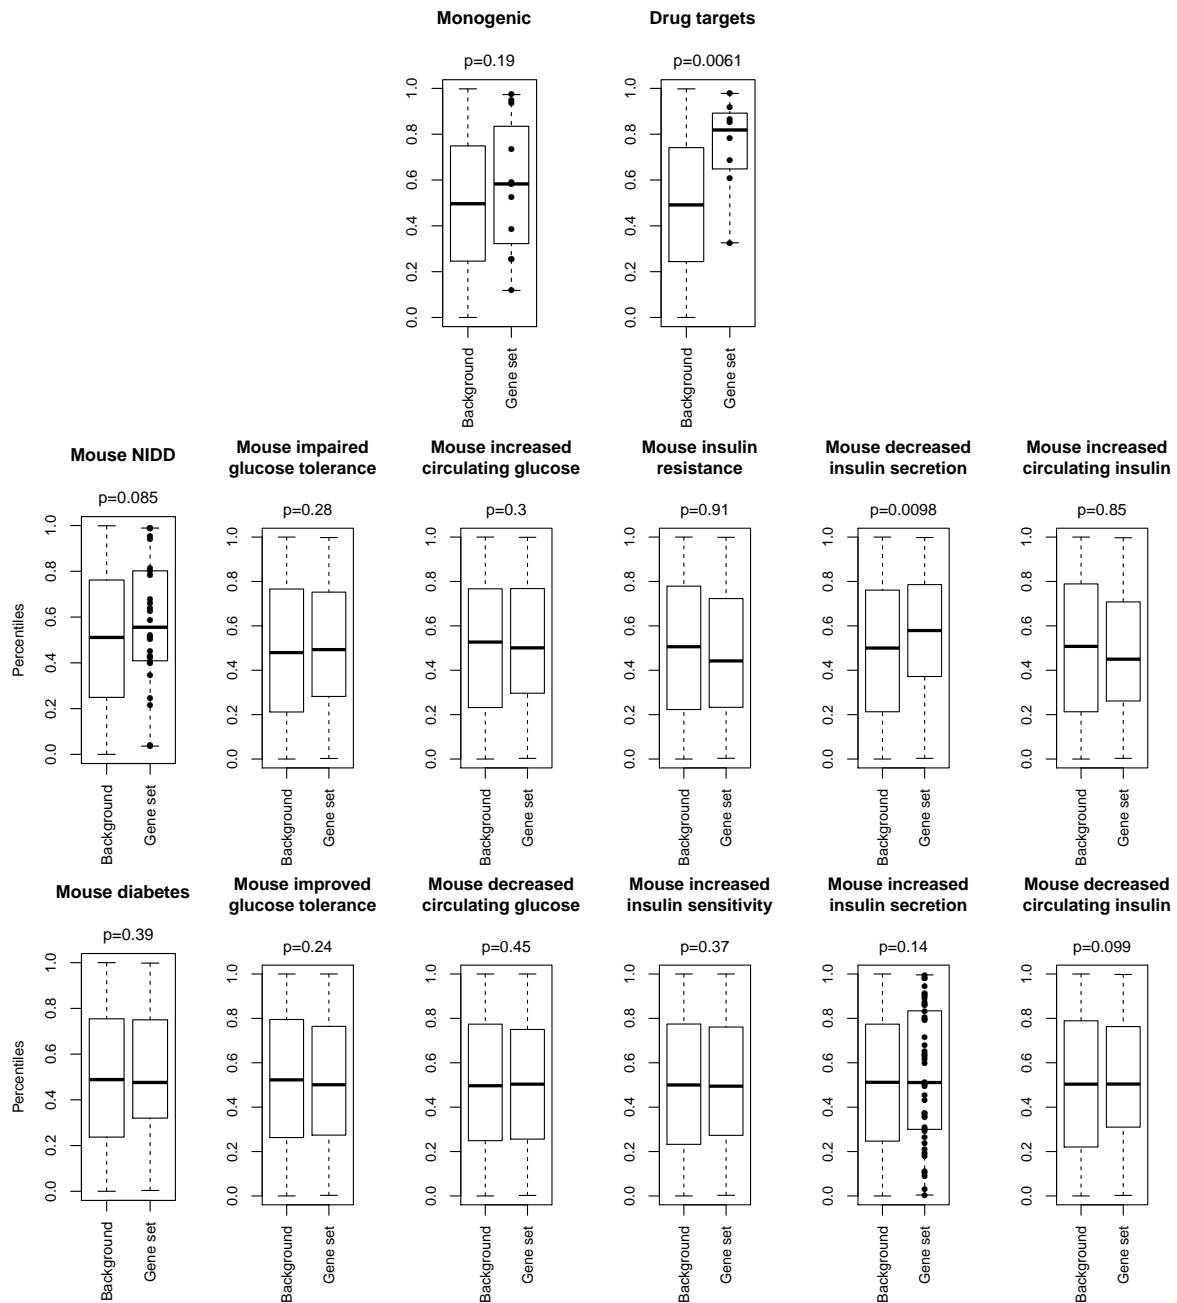

**Supplementary Figure 16: Gene set analysis from protein-truncating variants.** To assess the value of nonsynonymous variants in exome sequence gene set analysis, we conducted a similar rank-sum comparison of gene sets as that described in the main text – only using the burden test of protein truncating variants (PTVs, those included in the LofTe mask), rather than the minimum  $p$ -value burden test, to calculate gene-level associations. Shown are plots, analogous to those in **Supplementary Figure 15**, summarizing these PTV-based comparisons.

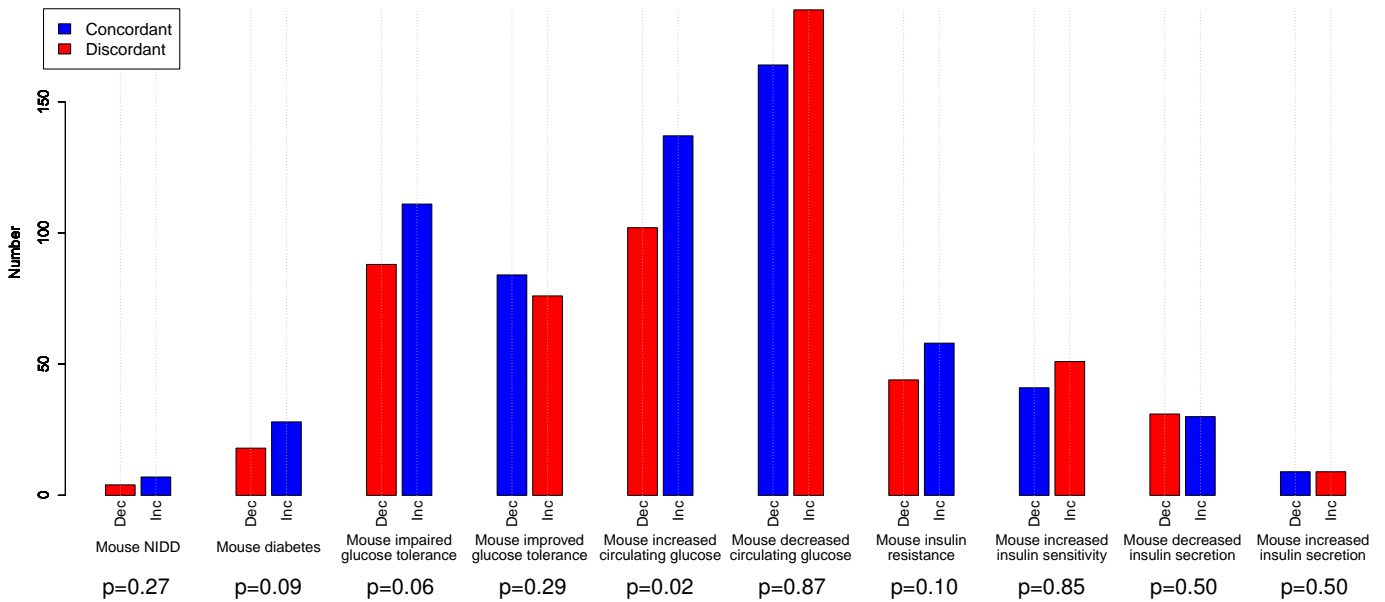

**Supplementary Figure 17: Directional consistency of genetic odds ratio estimates and knockout mouse phenotypes.** For each gene set associated with a knockout mouse phenotype for which there was a analogous human phenotype of increased or decreased T2D risk (**Methods**), we calculated the fraction of genes for which the odds-ratio (OR) estimated from the weighted burden test had a direction consistent with what would be predicted from the knockout mouse phenotype. Blue bars correspond to the number of genes with OR estimates concordant with that predicted from the mouse phenotype, while red bars correspond to the number with discordant OR estimates. *p*-values shown below the bars are calculated from a one-sided binomial test of the null hypothesis that < 50% of estimates are concordant. Dec: OR estimate is < 1. Inc: OR estimate is > 1.

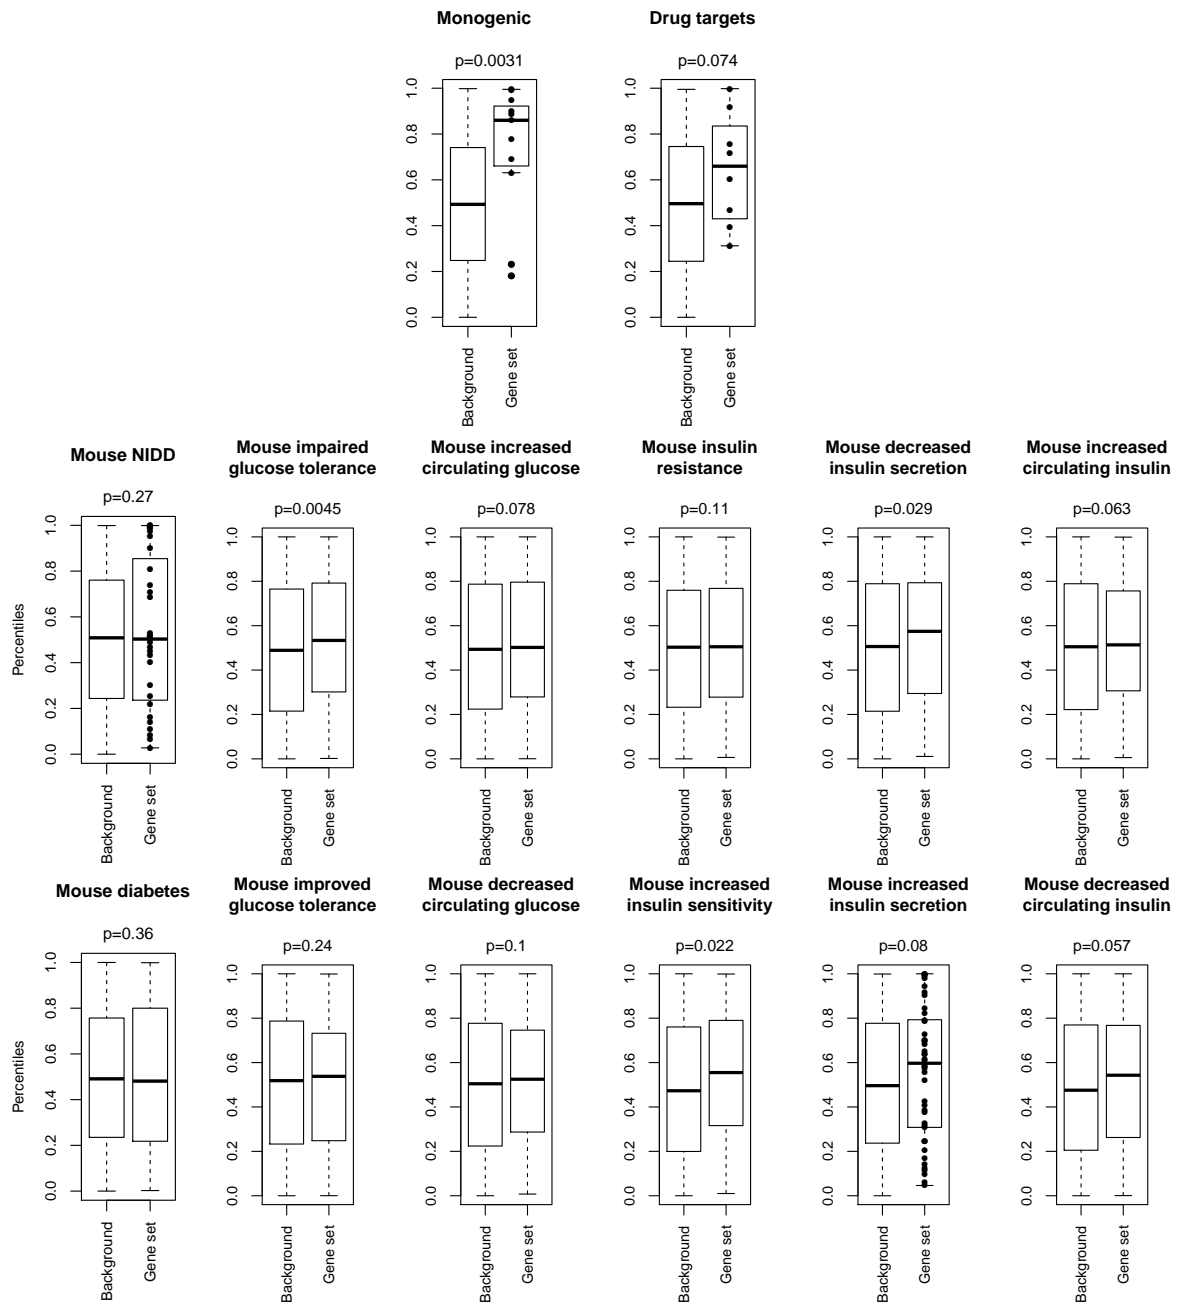

**Supplementary Figure 18: Gene set analysis from imputed GWAS statistics.** To assess how similarly array-based GWAS association statistics could identify gene set associations, as compared to exome sequence gene-level association statistics, we conducted a similar rank-sum comparison of gene sets as that described in the main text – only using gene MAGENTA [7] scores from the imputed GWAS rather than the minimum  $p$ -value burden test to calculate ranks. Shown are plots, analogous to those in **Supplementary Figure 15**, summarizing these GWAS-based comparisons.

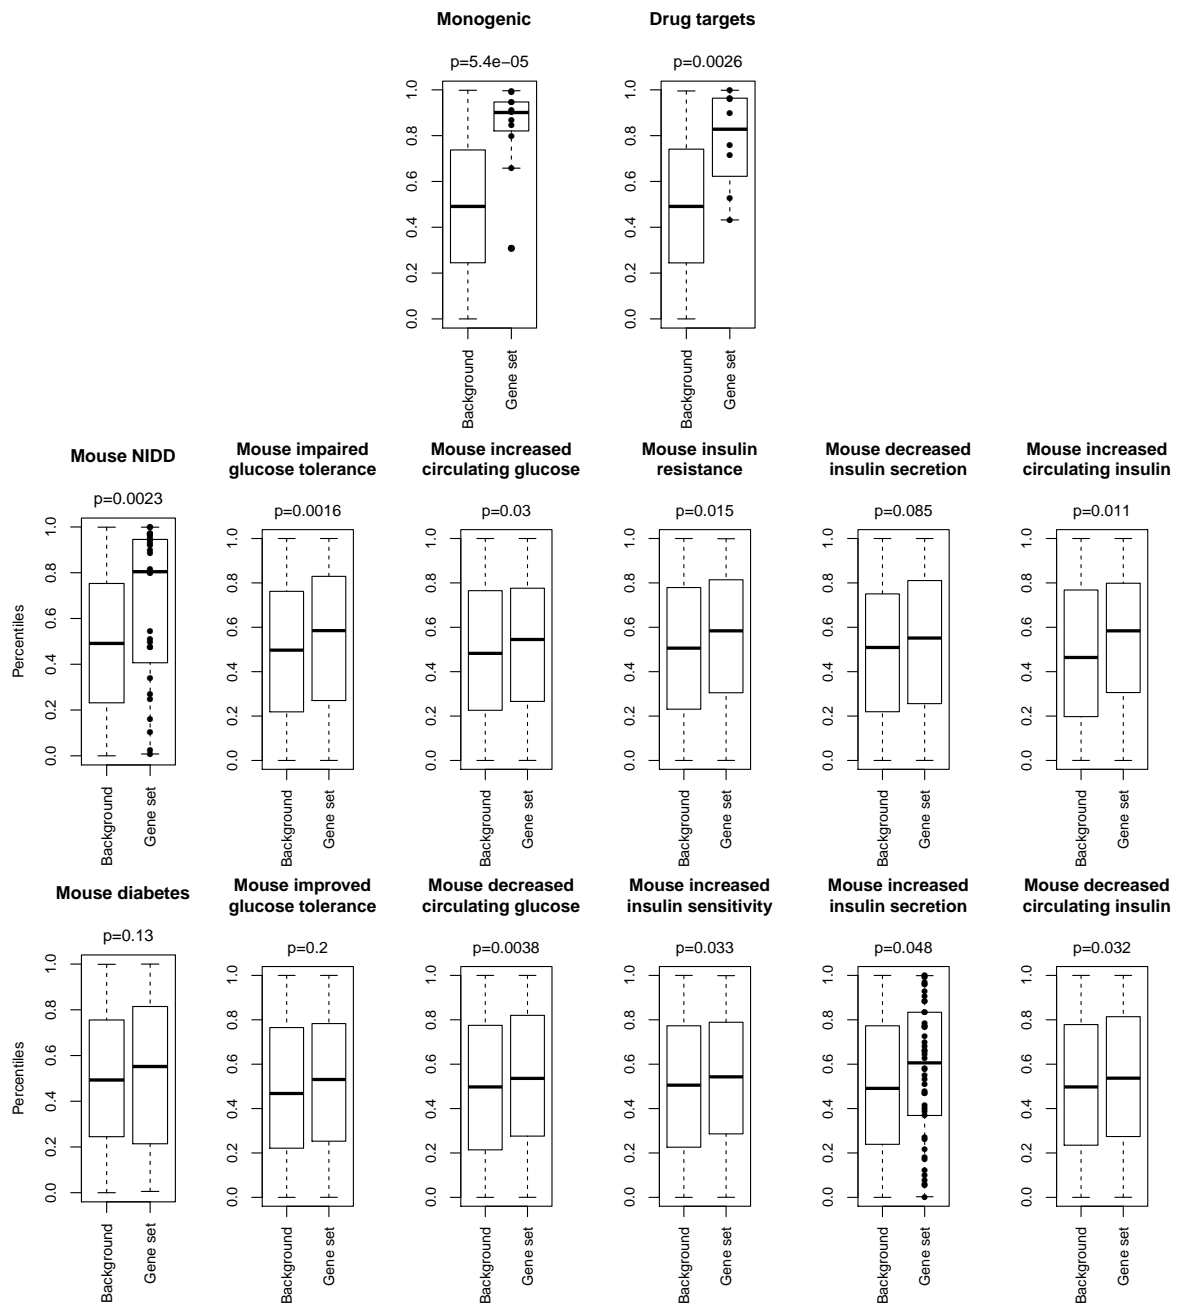

**Supplementary Figure 19: Gene set analysis from a larger array-based GWAS.** To assess whether the ability of GWAS statistics to prioritize genes was driven by sample size, rather than fundamental limitations of SNP arrays and imputation, we repeated our rank-sum analysis using gene MAGENTA [7] scores but from a large transethnic T2D GWAS [8] rather than the imputed GWAS in our study. Shown are plots, analogous to those in **Supplementary Figure 18**, summarizing these comparisons.

**Predicted power to detect known T2D drug targets at  $p=0.05$**

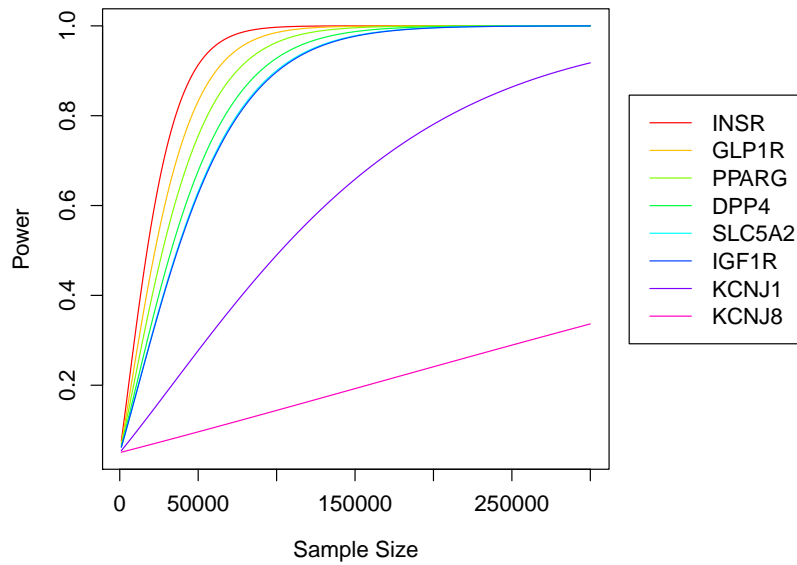

**Supplementary Figure 20: Power to exceed nominal significance for T2D drug targets.** Estimated power, as a function of sample size, to detect T2D gene-level associations (at significance  $p < 0.05$ ) for genes with genetic effects (aggregate frequency and odds ratios) equal to those estimated for eight established T2D drug targets. Power curves are shown and colored separately for each target. This figure is identical to that in **Figure 4a** except with a lower significance threshold used in power calculations.

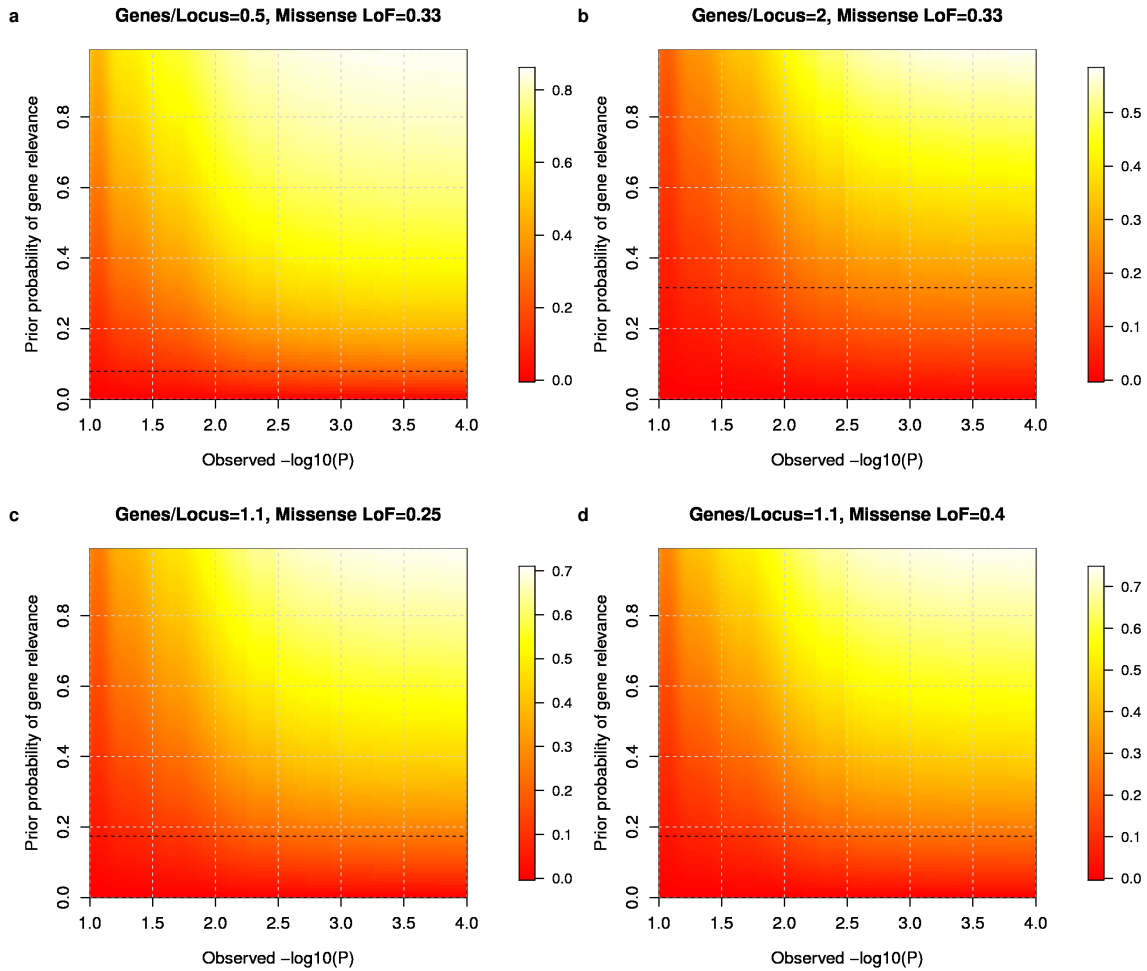

**Supplementary Figure 21: Estimated posterior probability of association for different prior hypotheses.** We estimated the posterior probability of association for nonsynonymous variants meeting various  $p$ -value thresholds in our analysis, as described in **Methods** and shown in **Figure 4c-f**. In order to perform the needed calculations, we assumed that, on average, 1.1 genes were within each T2D GWAS locus are relevant to T2D and 33% of missense mutations within these genes cause gene loss-of-function. To assess the sensitivity of our analysis to this assumption, we repeated the calculations with different assumptions of **(a)** 0.5 and **(b)** two T2D-relevant genes within each GWAS locus, as well as **(c)** 25% and **(d)** 40% of missense variants leading to loss-of-function. All figures shown assume the default modeling parameters that 30% of true nonsynonymous associations are causal associations; different values for this parameter would scale posterior probability estimates linearly.



### Nonsynonymous associations exome-wide

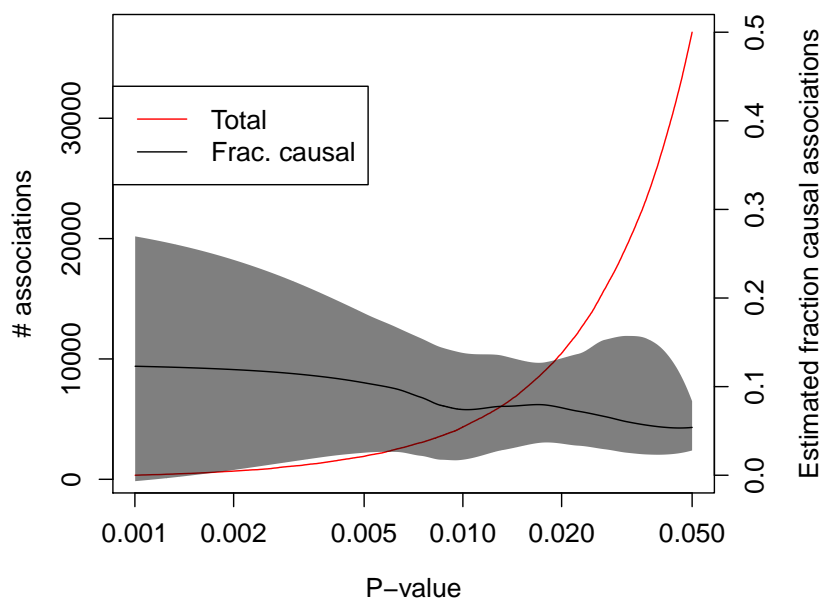

**Supplementary Figure 22: Exome-wide posterior estimates.** In addition to estimation of the posterior probability of association (PPA) for nonsynonymous variants within T2D GWAS loci, we also calculated PPA estimates for arbitrary variants exome-wide. Shown are these estimates (black line, gray 95% confidence interval; right axis), as well as the number of total variants (red line; left axis), as a function of single-variant  $p$ -value observed in our analysis. This plot is analogous to that in **Figure 4d**.

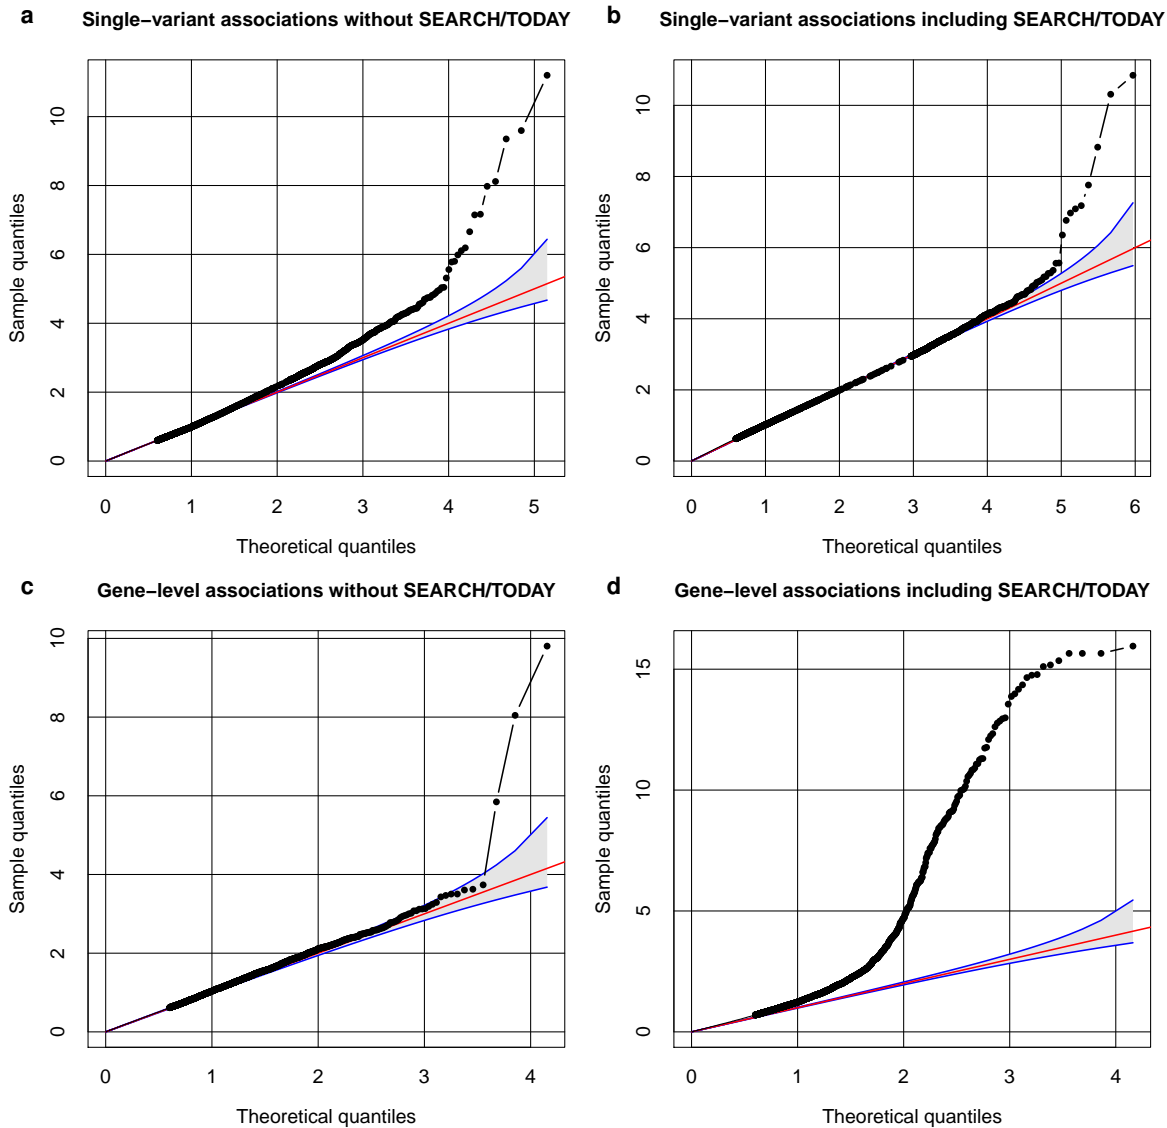

**Supplementary Figure 23: Analysis with SEARCH and TODAY samples included.** Among the cohorts initially sequenced for our exome sequence analysis were childhood diabetes cases from the SEARCH and TODAY studies (**Supplementary Table 1**). We initially hoped to include these cases in our analysis, but the lack of matched controls within these studies raised concerns about potential artifacts that could be introduced during association analysis. To evaluate the possibility of including these cohorts, we compared **(ab)** single-variant and **(cd)** gene-level associations with and without SEARCH and TODAY samples included. **(a)** A quantile-quantile (QQ) plot of single-variant associations computed without SEARCH and TODAY samples. By contrast with the results reported in the manuscript, association statistics here are computed via a meta-analysis of ancestry-level (rather than subgroup-level) association statistics, in order to match an analysis with SEARCH and TODAY samples as closely as possible (a subgroup-level meta-analysis is not possible with SEARCH and TODAY due to the absence of controls in those studies). Only variants with minor allele count above 15 are shown in the QQ plot. **(b)** A QQ plot of single-variant associations, identical to that in **(a)** but with SEARCH and TODAY samples included. **(c)** A QQ plot of gene-level burden associations from the 5/5 mask. Only genes with a total of 15 aggregate alternate alleles are shown in the QQ plot. **(d)** A QQ plot of gene-level burden associations from the 5/5 mask, identical to that in **(c)** but with SEARCH and TODAY samples included.

## References

- [1] Eilbeck, K. *et al.* The Sequence Ontology: a tool for the unification of genome annotations. *Genome Biol.* **6**, R44 (2005).
- [2] McLaren, W. *et al.* The Ensembl Variant Effect Predictor. *Genome Biol.* **17**, 122 (2016).
- [3] Zuk, O. *et al.* Searching for missing heritability: designing rare variant association studies. *Proc. Natl. Acad. Sci. U.S.A.* **111**, E455–464 (2014).
- [4] Fuchsberger, C. *et al.* The genetic architecture of type 2 diabetes. *Nature* **536**, 41–47 (2016).
- [5] Zeggini, E. *et al.* Meta-analysis of genome-wide association data and large-scale replication identifies additional susceptibility loci for type 2 diabetes. *Nat. Genet.* **40**, 638–645 (2008).
- [6] Farh, K. K. *et al.* Genetic and epigenetic fine mapping of causal autoimmune disease variants. *Nature* **518**, 337–343 (2015).
- [7] Segre, A. V., Groop, L., Mootha, V. K., Daly, M. J. & Altshuler, D. Common inherited variation in mitochondrial genes is not enriched for associations with type 2 diabetes or related glycemic traits. *PLoS Genet.* **6** (2010).
- [8] Mahajan, A. *et al.* Genome-wide trans-ancestry meta-analysis provides insight into the genetic architecture of type 2 diabetes susceptibility. *Nat. Genet.* **46**, 234–244 (2014).
